# Supplementary material
Source: publisher site journal article supplement (https://www.spandidos-publications.com/4230/downloadSupplementary)
Supplement: Supplementary file 1 [file downloadSupplementary]

## Sheet: Cytobands
Table SIV. Number of CNA in cytobands organized by event numbers.
Diffuse Gastric Cancer (DGC)								Intestinal Gastric Cancer (IGC)								Non atrophic gastritis (NAG)
Chromosome	Cytoband	Events	Accumulated length (Mb)	Type	Media events	Media length (Mbp)	Number of patients	Chromosome	Cytoband	Events	Accumulated length (Mb)	Type	Media events	Media length (Mb)	Number of patients	Chromosome	Cytoband	Events	Accumulated length (Mb)	Type	Media events	Media length (Mb)	Number of patients
X	q28	37	11.5	Gain	6.2	1.9	6	8	q24.3	24	12.662	Gain	6	3.2	4	X	q26.2	24	34.026	Gain	4	5.671	6
8	q24.22	29	15.8	Gain	5.8	3.2	5	13	q34	18	4.9018	Gain	4.5	1.2	4	X	p21.2	22	33.586	Gain	3.14286	4.798	7
1	q32.1	26	12.16	Gain	5.2	2.4	5	8	q24.21	18	6.2619	Gain	4.5	1.6	4	X	p22.33	19	167.504	Gain	2.71429	23.9291	7
8	q24.3	25	17.46	Gain	4.2	2.9	6	8	q24.22	16	6.4856	Gain	4	1.6	4	X	q23	16	63.079	Gain	2.66667	10.5132	6
1	q23.3	22	15.26	Gain	3.7	2.5	6	8	q12.1	16	5.8523	Gain	4	1.5	4	X	q26.3	13	217.774	Gain	1.85714	31.1106	7
1	q41	20	10.56	Gain	4	2.1	5	8	q24.23	15	3.3664	Gain	3.8	0.8	4	X	p21.1	11	1.348	Loss	2.2	0.2696	5
11	q25	19	3.57	Gain	4.8	0.9	4	8	p22	15	8.2107	Gain	7.5	4.1	2	X	q24	11	39.295	Gain	2.2	7.859	5
8	q12.1	18	12.06	Gain	4.5	3	4	8	q22.3	14	5.3056	Gain	3.5	1.3	4	X	q25	11	52.666	Gain	1.57143	7.52371	7
1	q32.2	16	9.14	Gain	2.7	1.5	6	8	q21.11	14	3.963	Gain	3.5	1	4	X	q28	11	95.571	Loss	1.83333	15.9285	6
4	q35.1	16	4.18	Loss	3.2	0.8	5	8	q21.13	14	3.3869	Gain	4.7	1.1	3	X	p21.1	10	23.461	Gain	2.5	5.86525	4
1	q31.1	15	6.95	Gain	3	1.4	5	8	q21.3	14	3.0116	Gain	4.7	1	3	1	q21.1	9	216.076	Gain	1.8	43.2152	5
2	p25.3	15	7.02	Gain	3.8	1.8	4	8	p12	14	3.6522	Gain	7	1.8	2	X	p22.13	9	63.681	Gain	1.8	12.7362	5
8	q21.3	15	6.59	Gain	5	2.2	3	8	q22.1	13	5.8895	Gain	3.3	1.5	4	4	p16.3	8	257.068	Gain	1.33333	42.8447	6
X	p22.2	15	5.66	Gain	5	1.9	3	8	q24.13	13	4.5659	Gain	4.3	1.5	3	16	p13.3	8	9.538	Gain	1.6	1.9076	5
8	q24.21	14	15.77	Gain	2.3	2.6	6	4	q28.3	13	3.1348	Loss	6.5	1.6	2	X	p11.4	8	10.932	Loss	1.33333	1.822	6
13	q14.3	14	4.24	Gain	4.7	1.4	3	5	p15.33	12	3.5814	Gain	4	1.2	3	X	p22.33	8	87.41	Loss	1.33333	14.5683	6
1	q25.2	13	11.09	Gain	2.6	2.2	5	8	q23.3	12	5.3571	Gain	4	1.8	3	X	q26.1	8	21.327	Gain	1.6	4.2654	5
1	q25.3	13	9.6	Gain	2.6	1.9	5	8	q24.12	12	3.7061	Gain	4	1.2	3	X	q27.1	8	4.824	Loss	1.6	0.9648	5
1	p36.32	13	5.67	Gain	2.6	1.1	5	8	p22	12	3.9202	Loss	12	3.9	1	11	p15.4	7	122.975	Loss	1.4	24.595	5
9	q34.3	13	5.46	Gain	3.3	1.4	4	8	p21.2	11	4.5082	Gain	3.7	1.5	3	X	q22.3	7	48.877	Gain	1.75	12.2193	4
20	p13	13	5.76	Gain	3.3	1.4	4	7	q11.22	11	2.9063	Loss	5.5	1.5	2	X	q27.1	7	45.774	Gain	1.4	9.1548	5
8	q13.3	12	6.37	Gain	2	1.1	6	7	q31.1	11	2.8097	Gain	11	2.8	1	4	q12	6	56.326	Loss	1	9.38767	6
1	q21.3	12	10.43	Gain	2.4	2.1	5	8	p23.1	10	6.7158	Gain	2.5	1.7	4	14	q32.33	6	2945.66	Gain	1	490.943	6
8	q12.3	12	5.42	Gain	2.4	1.1	5	8	q11.23	10	2.2613	Gain	3.3	0.8	3	X	q13.1	6	0.141	Loss	1	0.0235	6
1	q31.3	12	7.8	Gain	3	1.9	4	8	q22.2	10	1.7843	Gain	3.3	0.6	3	X	q21.1	6	13.637	Gain	1.5	3.40925	4
8	q22.3	12	8.83	Gain	3	2.2	4	10	q26.3	10	2.4956	Gain	3.3	0.8	3	X	q28	6	39.195	Gain	2	13.065	3
8	p23.3	12	4.49	Gain	3	1.1	4	19	p12	10	5.2909	Loss	3.3	1.8	3	6	q12	5	36.174	Loss	1.25	9.0435	4
3	p21.31	12	3.18	Loss	4	1.1	3	20	q13.33	10	5.321	Gain	3.3	1.8	3	7	p12.1	5	17.193	Gain	1	3.4386	5
13	q34	12	9.19	Gain	4	3.1	3	X	p22.33	10	19.357	Loss	3.3	6.5	3	7	q36.2	5	23.206	Loss	1	4.6412	5
X	p21.1	12	6.35	Gain	4	2.1	3	1	q43	10	2.8003	Loss	5	1.4	2	8	p23.1	5	2.661	Gain	1	0.5322	5
11	q14.1	12	4.17	Gain	6	2.1	2	19	p13.2	10	2.4438	Loss	5	1.2	2	8	q24.3	5	50.307	Gain	1.25	12.5768	4
1	q23.1	11	6.47	Gain	2.2	1.3	5	5	p13.2	10	2.2483	Gain	10	2.2	1	13	q31.3	5	35.7	Gain	1	7.14	5
1	q24.1	11	4.82	Gain	2.2	1	5	1	q41	9	1.4921	Loss	3	0.5	3	17	q11.2	5	10.9	Gain	1	2.18	5
8	q23.3	11	11.37	Gain	2.2	2.3	5	5	q11.2	9	2.4711	Loss	3	0.8	3	17	q21.2	5	49.059	Loss	1	9.8118	5
8	q22.1	11	6.11	Gain	2.2	1.2	5	8	q23.1	9	4.1561	Gain	3	1.4	3	22	q13.31	5	20.516	Gain	1	4.1032	5
8	q11.23	11	3.28	Gain	2.2	0.7	5	9	q33.3	9	1.2902	Gain	3	0.4	3	X	p21.3	5	7.403	Gain	2.5	3.7015	2
13	q21.33	11	5.42	Gain	2.8	1.4	4	11	q23.3	9	2.742	Gain	3	0.9	3	1	p36.13	4	5.258	Gain	1	1.3145	4
7	q11.23	11	3.01	Loss	3.7	1	3	1	q44	9	2.5925	Loss	4.5	1.3	2	1	q32.1	4	45.136	Loss	1.33333	15.0453	3
9	q33.1	11	4.83	Gain	3.7	1.6	3	5	p15.2	9	1.674	Gain	4.5	0.8	2	2	q14.3	4	28.32	Loss	1	7.08	4
16	p13.3	11	5.73	Gain	3.7	1.9	3	7	q11.23	9	3.0544	Loss	4.5	1.5	2	3	q22.1	4	24.684	Loss	2	12.342	2
1	q25.1	10	4.92	Gain	1.7	0.8	6	13	q31.1	9	1.5222	Gain	4.5	0.8	2	5	q35.3	4	233.283	Loss	1.33333	77.761	3
12	p13.33	10	3.56	Gain	1.7	0.6	6	14	q24.2	9	1.8855	Loss	4.5	0.9	2	8	p23.1	4	15.249	Loss	1.33333	5.083	3
1	q24.2	10	8.64	Gain	2	1.7	5	20	q12	9	4.8644	Gain	4.5	2.4	2	12	q12	4	8.755	Loss	1	2.18875	4
1	q42.13	10	6.09	Gain	2	1.2	5	20	p12.1	9	3.8374	Gain	4.5	1.9	2	15	q24.3	4	15.703	Loss	1	3.92575	4
4	q35.2	10	3.85	Loss	2	0.8	5	8	p21.3	9	2.5094	Loss	9	2.5	1	16	q12.2	4	100.586	Loss	1	25.1465	4
4	p14	10	3.75	Loss	2	0.8	5	Y	p11.2	9	5.0143	Gain	9	5	1	21	q22.3	4	22.186	Loss	1	5.5465	4
8	q24.13	10	4.21	Gain	2	0.8	5	1	q23.3	8	1.8632	Gain	2.7	0.6	3	22	q11.23	4	15.827	Loss	1	3.95675	4
5	q11.2	10	2.04	Loss	2.5	0.5	4	5	p15.31	8	1.4268	Gain	2.7	0.5	3	X	p21.2	4	0.952	Loss	1	0.238	4
20	p12.3	10	12.59	Gain	2.5	3.1	4	8	p21.3	8	5.2732	Gain	2.7	1.8	3	X	p21.3	4	6.14	Loss	1.33333	2.04667	3
X	p22.33	10	3	Loss	2.5	0.7	4	8	p23.3	8	3.7252	Gain	2.7	1.2	3	X	p22.31	4	3.039	Loss	1.33333	1.013	3
2	p24.1	10	4.52	Gain	3.3	1.5	3	8	q13.1	8	1.7506	Gain	2.7	0.6	3	X	q27.3	4	8.162	Gain	1	2.0405	4
4	q34.3	10	5.66	Loss	3.3	1.9	3	13	q32.1	8	1.3165	Gain	2.7	0.4	3	1	p13.3	3	92.236	Loss	1	30.7453	3
4	q32.3	10	2.29	Loss	3.3	0.8	3	15	q14	8	1.4942	Loss	2.7	0.5	3	1	p31.3	3	11.655	Gain	1	3.885	3
6	q14.1	10	1.73	Loss	3.3	0.6	3	14	q24.3	8	2.3563	Loss	4	1.2	2	1	p36.11	3	21.839	Loss	1	7.27967	3
7	p14.3	10	3.91	Gain	3.3	1.3	3	14	q24.3	8	1.5942	Gain	4	0.8	2	1	q44	3	185.746	Loss	1	61.9153	3
8	p23.1	10	3.21	Gain	3.3	1.1	3	X	q28	8	5.4388	Loss	4	2.7	2	3	p25.3	3	21.416	Loss	1.5	10.708	2
13	q14.11	10	3.05	Gain	3.3	1	3	X	q21.31	8	1.6083	Gain	8	1.6	1	3	q28	3	15.978	Loss	1	5.326	3
17	p13.2	10	2.14	Loss	3.3	0.7	3	8	q13.3	7	2.4228	Gain	1.8	0.6	4	4	q25	3	8.385	Gain	1	2.795	3
5	q35.1	10	2.04	Loss	5	1	2	14	q32.33	7	2.6159	Gain	1.8	0.7	4	4	q34.1	3	24.048	Loss	1	8.016	3
3	q24	10	2.7	Gain	10	2.7	1	3	q21.3	7	1.9599	Gain	2.3	0.7	3	4	q35.1	3	29.69	Loss	1	9.89667	3
5	q23.2	10	3.09	Loss	10	3.1	1	4	p16.1	7	1.4093	Gain	2.3	0.5	3	7	q36.1	3	0.969	Loss	1	0.323	3
1	q32.3	9	6.59	Gain	1.5	1.1	6	8	q12.3	7	2.4262	Gain	2.3	0.8	3	7	q36.3	3	31.357	Gain	1.5	15.6785	2
8	q24.23	9	3.26	Gain	1.8	0.7	5	10	q26.13	7	1.7476	Gain	2.3	0.6	3	8	p11.22	3	419.565	Loss	1	139.855	3
22	q13.2	9	1.48	Loss	1.8	0.3	5	10	q22.1	7	1.6737	Gain	2.3	0.6	3	8	p12	3	4.332	Gain	1	1.444	3
1	q21.1	9	3.62	Gain	2.3	0.9	4	13	q33.1	7	0.9357	Gain	2.3	0.3	3	8	q22.3	3	12.506	Loss	1	4.16867	3
4	p16.1	9	2.08	Gain	2.3	0.5	4	20	p11.23	7	2.9015	Gain	2.3	1	3	9	q21.11	3	16.381	Loss	1	5.46033	3
4	q33	9	2.03	Loss	2.3	0.5	4	22	q13.2	7	1.5519	Loss	2.3	0.5	3	10	p12.33	3	269.355	Loss	1	89.785	3
5	p15.33	9	3.92	Gain	2.3	1	4	7	q21.11	7	3.6586	Gain	3.5	1.8	2	10	q11.22	3	302.497	Loss	3	302.497	1
8	q23.1	9	6.18	Gain	2.3	1.5	4	7	q36.3	7	2.3452	Gain	3.5	1.2	2	10	q22.3	3	21.576	Loss	1	7.192	3
11	p15.1	9	2.88	Gain	2.3	0.7	4	7	q22.1	7	2.0687	Loss	3.5	1	2	11	p11.2	3	8.538	Loss	1	2.846	3
14	q24.3	9	1.89	Loss	2.3	0.5	4	8	p23.2	7	3.2443	Gain	3.5	1.6	2	11	q11	3	236.934	Loss	1	78.978	3
20	q13.33	9	2.71	Gain	2.3	0.7	4	10	q21.3	7	1.9478	Loss	3.5	1	2	12	q24.22	3	26.379	Loss	1	8.793	3
22	q12.2	9	2.52	Loss	2.3	0.6	4	11	p15.3	7	1.3741	Gain	3.5	0.7	2	13	q14.2	3	22.544	Loss	1	7.51467	3
1	p32.3	9	2.62	Loss	3	0.9	3	14	q31.3	7	2.5523	Loss	3.5	1.3	2	14	q21.1	3	147.847	Loss	1	49.2823	3
7	q36.3	9	4.11	Gain	3	1.4	3	X	q21.1	7	31.5	Loss	3.5	15.8	2	14	q24.1	3	22.482	Gain	1	7.494	3
8	q21.11	9	5.73	Gain	3	1.9	3	5	p13.3	7	1.9584	Gain	7	2	1	16	p13.3	3	4.026	Loss	1.5	2.013	2
9	q33.2	9	5.1	Gain	3	1.7	3	5	p12	7	1.6392	Gain	7	1.6	1	17	p13.3	3	16.444	Gain	1	5.48133	3
10	q21.3	9	2.06	Loss	3	0.7	3	8	p21.2	7	1.8315	Loss	7	1.8	1	17	q12	3	339.229	Gain	1	113.076	3
11	p15.2	9	2.64	Gain	3	0.9	3	2	q33.1	6	1.6928	Loss	1.5	0.4	4	17	q21.32	3	34.082	Loss	1	11.3607	3
13	q33.3	9	3.01	Gain	3	1	3	1	p36.32	6	2.2984	Gain	2	0.8	3	19	q13.42	3	64.987	Loss	1	21.6623	3
20	p12.2	9	5.41	Gain	3	1.8	3	1	q32.1	6	1.6831	Loss	2	0.6	3	22	q11.21	3	7.89	Gain	1	2.63	3
10	q23.1	9	2.14	Gain	4.5	1.1	2	1	q31.1	6	1.2202	Loss	2	0.4	3	22	q11.21	3	13.532	Loss	1.5	6.766	2
17	p13.1	9	1.7	Loss	4.5	0.8	2	1	q32.3	6	0.8761	Loss	2	0.3	3	X	p11.23	3	133.511	Gain	1.5	66.7555	2
20	q11.23	9	9.54	Gain	4.5	4.8	2	2	p22.3	6	1.5857	Loss	2	0.5	3	X	p22.11	3	3.85	Loss	1.5	1.925	2
19	p13.2	9	4.06	Loss	9	4.1	1	2	q33.3	6	0.9777	Gain	2	0.3	3	X	p22.12	3	7.987	Gain	1	2.66233	3
1	q42.2	8	2.64	Gain	1.6	0.5	5	4	p14	6	1.676	Loss	2	0.6	3	X	p22.2	3	7.997	Loss	1.5	3.9985	2
3	q21.3	8	2.41	Gain	1.6	0.5	5	5	q31.1	6	1.0074	Loss	2	0.3	3	X	p22.31	3	14.049	Gain	1.5	7.0245	2
4	q31.3	8	2.5	Loss	1.6	0.5	5	7	q21.11	6	1.2153	Loss	2	0.4	3	X	p22.32	3	6.73	Gain	1	2.24333	3
8	p11.22	8	1.14	Loss	1.6	0.2	5	8	q24.11	6	2.9644	Gain	2	1	3	X	q12	3	34.588	Gain	1	11.5293	3
2	p24.3	8	1.96	Gain	2	0.5	4	8	q21.2	6	1.7895	Gain	2	0.6	3	X	q24	3	4.324	Loss	1	1.44133	3
5	q14.1	8	2.26	Loss	2	0.6	4	1	p36.22	6	2.9541	Loss	3	1.5	2	1	p36.12	2	10.57	Loss	1	5.285	2
8	q11.21	8	3.32	Gain	2	0.8	4	1	p32.3	6	1.3658	Loss	3	0.7	2	1	q23.3	2	2.506	Gain	1	1.253	2
12	q13.13	8	1.61	Gain	2	0.4	4	1	p31.1	6	1.2074	Loss	3	0.6	2	2	q14.1	2	5.551	Loss	1	2.7755	2
X	p11.4	8	5.43	Gain	2	1.4	4	1	p34.2	6	1.1079	Gain	3	0.6	2	2	q21.3	2	7.042	Loss	1	3.521	2
X	q13.1	8	3.21	Gain	2	0.8	4	1	q42.2	6	0.9017	Loss	3	0.5	2	2	q31.2	2	9.556	Loss	1	4.778	2
4	q25	8	2.19	Loss	2.7	0.7	3	3	p14.2	6	1.1565	Gain	3	0.6	2	3	p24.1	2	12.807	Loss	1	6.4035	2
6	q21	8	1.89	Loss	2.7	0.6	3	7	p11.2	6	10.363	Loss	3	5.2	2	3	q12.2	2	199.595	Gain	1	99.7975	2
X	q26.2	8	2.23	Gain	2.7	0.7	3	7	q34	6	3.7507	Gain	3	1.9	2	3	q25.1	2	34.156	Gain	1	17.078	2
X	q26.3	8	1.94	Gain	2.7	0.6	3	7	p22.1	6	1.9115	Loss	3	1	2	4	q13.2	2	214.375	Gain	1	107.188	2
2	q31.1	8	4.54	Gain	4	2.3	2	8	p11.21	6	1.1916	Gain	3	0.6	2	4	q13.2	2	222.524	Loss	1	111.262	2
2	p12	8	3.55	Gain	4	1.8	2	10	q22.3	6	2.0769	Gain	3	1	2	4	q32.3	2	14.68	Loss	1	7.34	2
5	q23.1	8	4.61	Loss	4	2.3	2	11	q25	6	3.0016	Gain	3	1.5	2	5	p13.3	2	89.379	Gain	1	44.6895	2
7	q22.1	8	1.21	Loss	4	0.6	2	13	q32.3	6	1.1443	Gain	3	0.6	2	5	q11.2	2	1.764	Gain	1	0.882	2
12	q23.3	8	3.87	Gain	4	1.9	2	18	q21.1	6	1.6768	Gain	3	0.8	2	5	q14.1	2	8.966	Loss	1	4.483	2
19	p12	8	7.27	Loss	4	3.6	2	20	q13.12	6	3.4711	Gain	3	1.7	2	5	q31.1	2	19.23	Loss	1	9.615	2
20	q13.12	8	7.79	Gain	4	3.9	2	X	q28	6	1.2995	Gain	3	0.6	2	5	q33.1	2	43.55	Loss	1	21.775	2
22	q13.1	8	3.61	Loss	4	1.8	2	9	q21.13	6	0.8973	Gain	6	0.9	1	6	p12.1	2	9.45	Loss	1	4.725	2
10	q23.31	8	1.34	Gain	8	1.3	1	1	q25.2	5	1.3223	Gain	1.7	0.4	3	6	p21.32	2	17.423	Loss	1	8.7115	2
12	q12	8	2.28	Gain	8	2.3	1	1	p31.3	5	1.033	Gain	1.7	0.3	3	6	p24.2	2	27.696	Loss	1	13.848	2
14	q32.2	8	1.87	Gain	8	1.9	1	1	p13.3	5	0.7432	Loss	1.7	0.2	3	6	p25.3	2	85.592	Loss	1	42.796	2
1	q44	7	3.2	Gain	1.4	0.6	5	3	q23	5	1.5899	Gain	1.7	0.5	3	6	q22.1	2	17.897	Loss	1	8.9485	2
10	q26.3	7	3	Gain	1.4	0.6	5	4	q25	5	0.8754	Loss	1.7	0.3	3	6	q23.2	2	21.743	Loss	1	10.8715	2
20	p11.23	7	14.46	Gain	1.4	2.9	5	5	q33.3	5	0.7034	Loss	1.7	0.2	3	6	q27	2	16.624	Loss	1	8.312	2
20	p12.1	7	7.43	Gain	1.4	1.5	5	6	q13	5	1.0532	Loss	1.7	0.4	3	7	p14.2	2	8.372	Gain	1	4.186	2
1	p33	7	2.1	Gain	1.8	0.5	4	6	q21	5	1.0479	Loss	1.7	0.3	3	7	p22.1	2	55.08	Loss	1	27.54	2
1	q42.12	7	1.63	Gain	1.8	0.4	4	8	p11.23	5	0.9869	Gain	1.7	0.3	3	7	q21.2	2	20.783	Loss	1	10.3915	2
5	q31.1	7	2.39	Loss	1.8	0.6	4	9	q34.2	5	0.9594	Gain	1.7	0.3	3	7	q21.2	2	7.032	Gain	1	3.516	2
8	p21.3	7	3.57	Gain	1.8	0.9	4	11	p11.12	5	9.5769	Loss	1.7	3.2	3	7	q22.1	2	12.948	Gain	1	6.474	2
11	p15.3	7	2.09	Gain	1.8	0.5	4	11	p15.5	5	1.8199	Gain	1.7	0.6	3	7	q31.1	2	31.599	Loss	2	31.599	1
11	p15.5	7	1.74	Gain	1.8	0.4	4	11	p11.2	5	0.9228	Gain	1.7	0.3	3	7	q32.1	2	19.63	Loss	1	9.815	2
2	p16.1	7	5.58	Gain	2.3	1.9	3	11	q22.3	5	0.7143	Loss	1.7	0.2	3	7	q35	2	4.965	Loss	1	2.4825	2
3	q13.31	7	4.45	Gain	2.3	1.5	3	12	p13.33	5	1.723	Gain	1.7	0.6	3	7	q36.2	2	8.1	Gain	1	4.05	2
6	q13	7	1.59	Loss	2.3	0.5	3	12	q24.33	5	1.5088	Gain	1.7	0.5	3	8	p11.22	2	253.059	Gain	1	126.529	2
8	q21.13	7	5.68	Gain	2.3	1.9	3	15	q21.2	5	1.1484	Loss	1.7	0.4	3	8	p23.2	2	20.288	Loss	1	10.144	2
8	q22.2	7	1.94	Gain	2.3	0.6	3	20	q13.32	5	3.8653	Gain	1.7	1.3	3	8	q12.1	2	11.665	Loss	1	5.8325	2
8	p21.2	7	1.31	Gain	2.3	0.4	3	1	p34.3	5	2.4436	Gain	2.5	1.2	2	8	q13.3	2	6.764	Loss	1	3.382	2
9	q31.2	7	2.3	Gain	2.3	0.8	3	1	p33	5	1.7569	Gain	2.5	0.9	2	9	q34.13	2	3.929	Loss	1	1.9645	2
10	q22.1	7	3.07	Gain	2.3	1	3	1	p13.3	5	1.2833	Gain	2.5	0.6	2	10	p11.21	2	54.689	Loss	1	27.3445	2
11	q23.3	7	1.99	Gain	2.3	0.7	3	1	p13.2	5	1.1075	Gain	2.5	0.6	2	10	q23.1	2	6.634	Loss	2	6.634	1
13	q33.1	7	1.26	Gain	2.3	0.4	3	1	p34.3	5	1.0409	Loss	2.5	0.5	2	10	q26.13	2	46.492	Loss	1	23.246	2
1	q43	7	1.97	Gain	3.5	1	2	1	q31.2	5	0.726	Loss	2.5	0.4	2	10	q26.3	2	10.86	Gain	1	5.43	2
6	q16.3	7	1.25	Loss	3.5	0.6	2	2	p22.1	5	1.3182	Loss	2.5	0.7	2	11	p11.12	2	71.745	Loss	1	35.8725	2
7	q11.22	7	1.83	Loss	3.5	0.9	2	2	q31.1	5	0.9142	Loss	2.5	0.5	2	11	p15.1	2	39.146	Gain	1	19.573	2
7	p14.1	7	1.5	Gain	3.5	0.8	2	3	p24.3	5	0.9617	Loss	2.5	0.5	2	11	p15.1	2	28.18	Loss	1	14.09	2
8	p12	7	2.07	Loss	3.5	1	2	6	q15	5	0.8719	Loss	2.5	0.4	2	11	q12.2	2	19.608	Loss	1	9.804	2
10	q21.1	7	3.82	Gain	3.5	1.9	2	7	p14.3	5	1.4951	Gain	2.5	0.7	2	11	q14.3	2	60.298	Loss	1	30.149	2
16	q22.1	7	3.29	Loss	3.5	1.6	2	7	q11.21	5	0.948	Loss	2.5	0.5	2	12	p13.2	2	67.634	Loss	1	33.817	2
17	p11.2	7	1.31	Loss	3.5	0.7	2	9	q34.3	5	1.9536	Gain	2.5	1	2	12	p13.33	2	34.173	Loss	1	17.0865	2
20	q13.13	7	2.64	Gain	3.5	1.3	2	10	q22.1	5	0.9139	Loss	2.5	0.5	2	12	q13.11	2	27.698	Loss	1	13.849	2
1	p31.3	7	1.72	Loss	7	1.7	1	11	p15.1	5	1.411	Gain	2.5	0.7	2	12	q15	2	7.454	Loss	1	3.727	2
2	q34	7	5.42	Gain	7	5.4	1	12	q23.1	5	0.8065	Loss	2.5	0.4	2	12	q21.31	2	14.43	Loss	1	7.215	2
4	q13.1	7	1.74	Gain	7	1.7	1	14	q32.11	5	1.0776	Loss	2.5	0.5	2	12	q23.1	2	5.941	Loss	1	2.9705	2
12	q23.1	7	3.47	Gain	7	3.5	1	15	q21.1	5	1.1618	Gain	2.5	0.6	2	13	q21.32	2	9.97	Gain	1	4.985	2
19	p13.3	7	2.59	Loss	7	2.6	1	17	q11.2	5	1.2884	Loss	2.5	0.6	2	14	q22.1	2	21.41	Loss	1	10.705	2
22	q11.22	6	1.24	Gain	1	0.2	6	1	p36.11	5	1.1273	Loss	5	1.1	1	14	q23.3	2	13.337	Loss	1	6.6685	2
1	q24.3	6	5.39	Gain	1.2	1.1	5	4	q24	5	0.6676	Loss	5	0.7	1	14	q31.3	2	38.9	Loss	1	19.45	2
10	q22.3	6	3.24	Gain	1.2	0.6	5	5	p15.1	5	1.432	Gain	5	1.4	1	15	q21.3	2	9.252	Loss	1	4.626	2
14	q32.33	6	4.06	Gain	1.2	0.8	5	7	q31.32	5	1.3777	Gain	5	1.4	1	16	p11.2	2	655.36	Loss	1	327.68	2
1	q23.2	6	2.22	Gain	1.5	0.6	4	10	q25.2	5	0.8379	Loss	5	0.8	1	16	q12.2	2	64.823	Gain	1	32.4115	2
2	q31.2	6	5.26	Gain	1.5	1.3	4	14	q31.1	5	0.8624	Loss	5	0.9	1	19	q12	2	14.018	Loss	1	7.009	2
4	q13.3	6	0.88	Loss	1.5	0.2	4	15	q21.1	5	1.108	Loss	5	1.1	1	22	q11.22	2	153.375	Gain	1	76.6875	2
10	q26.2	6	7.45	Gain	1.5	1.9	4	17	q25.3	5	0.9629	Gain	5	1	1	22	q11.23	2	21.528	Gain	1	10.764	2
10	q11.21	6	2.04	Gain	1.5	0.5	4	20	p12.3	5	4.7962	Gain	5	4.8	1	22	q12.3	2	0.633	Gain	1	0.3165	2
12	q24.33	6	2.63	Gain	1.5	0.7	4	X	q21.1	5	0.8915	Gain	5	0.9	1	22	q13.31	2	6.617	Loss	1	3.3085	2
19	q13.2	6	2.24	Gain	1.5	0.6	4	Y	q11.221	5	1.089	Loss	5	1.1	1	X	p22.11	2	9.911	Gain	1	4.9555	2
2	p25.1	6	2.68	Gain	2	0.9	3	4	q28.2	4	0.6431	Loss	1	0.2	4	X	p22.2	2	3.728	Gain	1	1.864	2
2	q33.3	6	2.25	Gain	2	0.7	3	8	p11.22	4	0.5621	Loss	1	0.1	4	X	q21.2	2	5.416	Gain	1	2.708	2
3	q23	6	4.4	Gain	2	1.5	3	2	p16.1	4	0.7561	Loss	1.3	0.3	3	X	q21.33	2	10.055	Gain	1	5.0275	2
5	p12	6	12.06	Loss	2	4	3	3	p25.3	4	1.0866	Gain	1.3	0.4	3	X	q22.1	2	5.806	Gain	1	2.903	2
6	p21.2	6	3.55	Gain	2	1.2	3	3	p13	4	0.5431	Gain	1.3	0.2	3	X	q22.3	2	2.356	Loss	2	2.356	1
9	q22.2	6	1.89	Gain	2	0.6	3	4	q31.3	4	0.7966	Loss	1.3	0.3	3	X	q26.3	2	4.642	Loss	1	2.321	2
9	p23	6	1.02	Gain	2	0.3	3	5	q31.1	4	2.2379	Gain	1.3	0.7	3	1	p13.1	1	12.154	Loss	1	12.154	1
10	p15.3	6	1.38	Gain	2	0.5	3	6	q12	4	0.7122	Loss	1.3	0.2	3	1	p22.2	1	7.299	Loss	1	7.299	1
10	p11.21	6	1.23	Loss	2	0.4	3	8	q11.21	4	1.3855	Gain	1.3	0.5	3	1	p31.3	1	6.519	Loss	1	6.519	1
11	q22.3	6	1.8	Loss	2	0.6	3	9	q33.2	4	0.6485	Gain	1.3	0.2	3	1	p32.3	1	3.258	Loss	1	3.258	1
13	q12.11	6	1.1	Gain	2	0.4	3	13	q14.11	4	0.7872	Gain	1.3	0.3	3	1	p35.2	1	2.285	Loss	1	2.285	1
15	q21.1	6	1.86	Gain	2	0.6	3	17	q23.2	4	1.3814	Loss	1.3	0.5	3	1	p36.32	1	27.616	Gain	1	27.616	1
15	q26.3	6	0.8	Gain	2	0.3	3	17	q24.3	4	0.708	Loss	1.3	0.2	3	1	q21.3	1	71.806	Loss	1	71.806	1
17	p13.3	6	1.78	Loss	2	0.6	3	20	q11.21	4	0.5976	Gain	1.3	0.2	3	1	q24.2	1	38.766	Loss	1	38.766	1
22	q12.3	6	0.88	Loss	2	0.3	3	1	q32.1	4	1.7303	Gain	2	0.9	2	1	q25.1	1	8.676	Loss	1	8.676	1
X	q21.31	6	1.52	Gain	2	0.5	3	1	p36.23	4	1.4214	Loss	2	0.7	2	1	q31.3	1	26.545	Loss	1	26.545	1
X	q23	6	1.51	Gain	2	0.5	3	1	p32.2	4	1.0266	Gain	2	0.5	2	1	q31.3	1	48.992	Gain	1	48.992	1
4	q34.1	6	1.19	Loss	3	0.6	2	1	q21.3	4	0.8799	Gain	2	0.4	2	1	q41	1	5.737	Loss	1	5.737	1
5	q34	6	1.64	Loss	3	0.8	2	2	q37.3	4	1.5302	Gain	2	0.8	2	1	q42.12	1	6.74	Loss	1	6.74	1
6	q15	6	1.64	Loss	3	0.8	2	2	q32.1	4	0.704	Loss	2	0.4	2	2	p15	1	4.847	Loss	1	4.847	1
7	p12.3	6	2	Gain	3	1	2	2	p16.1	4	0.6925	Gain	2	0.3	2	2	p16.3	1	4.071	Loss	1	4.071	1
7	p22.1	6	1.12	Loss	3	0.6	2	2	p25.3	4	0.6777	Gain	2	0.3	2	2	p21	1	2.635	Loss	1	2.635	1
11	p14.1	6	3.31	Gain	3	1.7	2	3	q22.3	4	1.0456	Loss	2	0.5	2	2	q11.2	1	136.537	Loss	1	136.537	1
11	p11.2	6	1.61	Gain	3	0.8	2	3	q29	4	0.7927	Loss	2	0.4	2	2	q12.2	1	5.211	Loss	1	5.211	1
12	q24.31	6	3.14	Loss	3	1.6	2	3	q26.33	4	0.5643	Loss	2	0.3	2	2	q21.1	1	88.953	Loss	1	88.953	1
13	q33.2	6	2.2	Gain	3	1.1	2	3	p21.31	4	0.5275	Loss	2	0.3	2	2	q23.1	1	3.258	Loss	1	3.258	1
15	q25.1	6	1.47	Gain	3	0.7	2	4	q32.1	4	0.7294	Loss	2	0.4	2	2	q23.3	1	10.623	Loss	1	10.623	1
17	q11.2	6	1.5	Loss	3	0.8	2	4	q12	4	0.6471	Loss	2	0.3	2	2	q24.2	1	5.529	Loss	1	5.529	1
20	q11.21	6	1.69	Gain	3	0.8	2	5	p12	4	7.7147	Loss	2	3.9	2	2	q33.3	1	7.586	Loss	1	7.586	1
X	p22.31	6	7.91	Gain	3	4	2	5	q14.3	4	0.667	Loss	2	0.3	2	2	q34	1	7.038	Loss	1	7.038	1
2	q32.1	6	5.49	Gain	6	5.5	1	5	q32	4	0.5914	Gain	2	0.3	2	2	q36.1	1	4.878	Loss	1	4.878	1
2	q11.2	6	4.27	Gain	6	4.3	1	5	q15	4	0.5029	Loss	2	0.3	2	2	q37.1	1	13.244	Loss	1	13.244	1
2	q35	6	4.02	Gain	6	4	1	7	q36.2	4	2.2372	Gain	2	1.1	2	3	p12.3	1	2.589	Gain	1	2.589	1
2	q14.3	6	3.04	Gain	6	3	1	7	q36.1	4	1.6728	Gain	2	0.8	2	3	p14.2	1	0.922	Loss	1	0.922	1
2	q37.1	6	2.79	Gain	6	2.8	1	7	p22.3	4	1.0053	Gain	2	0.5	2	3	p21.1	1	7.482	Loss	1	7.482	1
2	q22.1	6	2.17	Gain	6	2.2	1	7	q32.1	4	0.9554	Gain	2	0.5	2	3	p21.31	1	1.561	Loss	1	1.561	1
2	q24.1	6	1.7	Gain	6	1.7	1	7	q21.3	4	0.7017	Loss	2	0.4	2	3	p25.1	1	2.105	Loss	1	2.105	1
3	p12.3	6	4.27	Gain	6	4.3	1	8	p11.22	4	0.8538	Gain	2	0.4	2	3	p25.2	1	6.321	Loss	1	6.321	1
3	q26.2	6	1.96	Gain	6	2	1	10	p12.31	4	0.7202	Loss	2	0.4	2	3	q13.33	1	4.795	Loss	1	4.795	1
4	q13.3	6	2.62	Gain	6	2.6	1	11	p15.2	4	1.6535	Gain	2	0.8	2	3	q22.2	1	2.67	Loss	1	2.67	1
5	q15	6	5.58	Loss	6	5.6	1	11	p11.2	4	1.3905	Loss	2	0.7	2	3	q26.1	1	43.852	Loss	1	43.852	1
5	q21.3	6	3.88	Loss	6	3.9	1	11	q14.1	4	1.3474	Gain	2	0.7	2	3	q26.32	1	0.577	Gain	1	0.577	1
5	q14.3	6	1.79	Loss	6	1.8	1	12	q13.13	4	1.4352	Gain	2	0.7	2	3	q27.3	1	1.142	Loss	1	1.142	1
12	p12.1	6	2.87	Gain	6	2.9	1	13	q33.2	4	2.3422	Gain	2	1.2	2	3	q29	1	4.715	Loss	1	4.715	1
19	p13.11	6	2.64	Loss	6	2.6	1	14	q32.31	4	1.18	Loss	2	0.6	2	4	p16.1	1	4.941	Loss	1	4.941	1
9	q34.2	5	2.26	Gain	1	0.5	5	14	q32.12	4	0.7768	Loss	2	0.4	2	4	p16.2	1	0.753	Loss	1	0.753	1
12	q24.21	5	2.16	Gain	1	0.4	5	15	q23	4	1.3946	Gain	2	0.7	2	4	q12	1	0.54	Gain	1	0.54	1
3	q22.2	5	2.32	Gain	1.3	0.6	4	15	q15.1	4	0.672	Loss	2	0.3	2	4	q21.23	1	1.368	Loss	1	1.368	1
4	q28.2	5	0.7	Loss	1.3	0.2	4	16	q12.2	4	0.9276	Gain	2	0.5	2	4	q26	1	10.896	Loss	1	10.896	1
6	q22.31	5	0.87	Loss	1.3	0.2	4	17	q22	4	1.1806	Loss	2	0.6	2	5	q11.2	1	5.655	Loss	1	5.655	1
8	q24.11	5	1.74	Gain	1.3	0.4	4	17	q12	4	0.7162	Loss	2	0.4	2	5	q12.3	1	5.72	Gain	1	5.72	1
10	q11.22	5	6.43	Gain	1.3	1.6	4	18	q22.3	4	1.813	Gain	2	0.9	2	5	q13.3	1	8.067	Loss	1	8.067	1
X	p22.13	5	6.56	Gain	1.3	1.6	4	18	q12.2	4	1.0381	Gain	2	0.5	2	5	q21.3	1	5.849	Loss	1	5.849	1
1	q31.2	5	4.4	Gain	1.7	1.5	3	20	p13	4	1.6685	Gain	2	0.8	2	5	q22.2	1	6.595	Loss	1	6.595	1
1	p13.3	5	1.03	Loss	1.7	0.3	3	20	p11.21	4	1.6244	Gain	2	0.8	2	5	q31.3	1	24.182	Loss	1	24.182	1
2	q14.2	5	1.72	Gain	1.7	0.6	3	20	q13.2	4	1.389	Gain	2	0.7	2	5	q32	1	2.33	Loss	1	2.33	1
2	p25.2	5	1.58	Gain	1.7	0.5	3	22	q12.2	4	1.1569	Loss	2	0.6	2	5	q34	1	15.549	Loss	1	15.549	1
3	p14.3	5	1.67	Loss	1.7	0.6	3	1	p36.12	4	1.0534	Loss	4	1.1	1	5	q35.2	1	39.229	Loss	1	39.229	1
4	p15.2	5	0.97	Gain	1.7	0.3	3	1	p36.33	4	0.6218	Gain	4	0.6	1	6	p21.2	1	1.234	Loss	1	1.234	1
6	q25.2	5	0.95	Loss	1.7	0.3	3	3	q29	4	0.5083	Gain	4	0.5	1	6	p21.33	1	73.554	Loss	1	73.554	1
7	q34	5	1.8	Gain	1.7	0.6	3	4	q35.1	4	0.6128	Loss	4	0.6	1	6	p22.1	1	56.24	Loss	1	56.24	1
7	p12.1	5	0.77	Gain	1.7	0.3	3	4	p13	4	0.5396	Loss	4	0.5	1	6	p22.2	1	6.03	Loss	1	6.03	1
8	q24.12	5	11.3	Gain	1.7	3.8	3	4	q32.2	4	0.5351	Loss	4	0.5	1	6	p22.3	1	2.015	Gain	1	2.015	1
8	q21.12	5	2.17	Gain	1.7	0.7	3	5	p14.1	4	0.6175	Gain	4	0.6	1	6	q14.1	1	22.265	Loss	1	22.265	1
9	q33.3	5	6.59	Gain	1.7	2.2	3	5	p13.1	4	0.5918	Gain	4	0.6	1	6	q15	1	1.121	Loss	1	1.121	1
9	q22.33	5	1.31	Gain	1.7	0.4	3	6	q27	4	0.8419	Gain	4	0.8	1	6	q16.3	1	0.189	Loss	1	0.189	1
9	q31.1	5	1.08	Gain	1.7	0.4	3	6	q22.1	4	0.6711	Loss	4	0.7	1	6	q16.3	1	2.159	Gain	1	2.159	1
9	q21.11	5	0.72	Gain	1.7	0.2	3	7	q31.2	4	1.9542	Gain	4	2	1	6	q22.31	1	5.325	Loss	1	5.325	1
10	q26.13	5	2.95	Gain	1.7	1	3	7	q21.3	4	1.2383	Gain	4	1.2	1	6	q23.1	1	2.873	Loss	1	2.873	1
10	p12.1	5	1.23	Loss	1.7	0.4	3	7	q11.23	4	1.1257	Gain	4	1.1	1	6	q26	1	15.278	Gain	1	15.278	1
11	p11.2	5	1.33	Loss	1.7	0.4	3	9	q34.11	4	1.023	Gain	4	1	1	7	p12.1	1	3.429	Loss	1	3.429	1
12	p13.32	5	2.06	Gain	1.7	0.7	3	9	p21.3	4	0.5632	Loss	4	0.6	1	7	p13	1	14.47	Loss	1	14.47	1
13	q32.1	5	1.07	Gain	1.7	0.4	3	12	q23.3	4	1.0915	Loss	4	1.1	1	7	p15.1	1	11.917	Gain	1	11.917	1
14	q24.2	5	1.1	Gain	1.7	0.4	3	12	p11.21	4	0.867	Loss	4	0.9	1	7	p21.3	1	4.29	Loss	1	4.29	1
14	q21.3	5	1.01	Loss	1.7	0.3	3	12	q22	4	0.4689	Loss	4	0.5	1	7	p22.1	1	83.056	Gain	1	83.056	1
15	q21.3	5	1.06	Gain	1.7	0.4	3	13	q31.1	4	0.7956	Loss	4	0.8	1	7	p22.3	1	8.842	Loss	1	8.842	1
18	q11.2	5	0.7	Loss	1.7	0.2	3	16	q12.1	4	0.774	Gain	4	0.8	1	7	q11.22	1	4.708	Gain	1	4.708	1
20	q13.32	5	8.98	Gain	1.7	3	3	18	q11.2	4	0.6621	Loss	4	0.7	1	7	q11.23	1	21.831	Loss	1	21.831	1
X	q25	5	1.08	Gain	1.7	0.4	3	19	p13.3	4	1.425	Gain	4	1.4	1	7	q21.3	1	5.61	Loss	1	5.61	1
1	p13.2	5	2.41	Loss	2.5	1.2	2	20	q11.23	4	0.9046	Gain	4	0.9	1	7	q31.2	1	10.191	Loss	1	10.191	1
1	p36.13	5	2.32	Gain	2.5	1.2	2	Y	p11.2	4	1.5654	Loss	4	1.6	1	7	q34	1	10.376	Loss	1	10.376	1
1	p31.1	5	1.39	Loss	2.5	0.7	2	Y	q11.223	4	1.0935	Loss	4	1.1	1	7	q34	1	10.122	Gain	1	10.122	1
2	q36.3	5	1.71	Gain	2.5	0.9	2	1	p33	3	0.4391	Loss	1	0.1	3	7	q35	1	2.876	Gain	1	2.876	1
3	p13	5	2.85	Gain	2.5	1.4	2	4	q31.1	3	0.7198	Loss	1	0.2	3	7	q36.3	1	5.035	Loss	1	5.035	1
3	q22.3	5	1.14	Loss	2.5	0.6	2	4	q32.3	3	0.3902	Loss	1	0.1	3	8	p11.21	1	800.323	Gain	1	800.323	1
3	p22.3	5	1.06	Loss	2.5	0.5	2	7	p14.1	3	0.6446	Loss	1	0.2	3	8	p21.2	1	1.713	Loss	1	1.713	1
5	p15.31	5	1.27	Gain	2.5	0.6	2	7	p11.2	3	0.4411	Gain	1	0.1	3	8	p22	1	3.301	Loss	1	3.301	1
5	q33.3	5	0.94	Loss	2.5	0.5	2	8	q12.2	3	1.4088	Gain	1	0.5	3	8	p23.2	1	1.76	Gain	1	1.76	1
10	q25.2	5	2.77	Gain	2.5	1.4	2	9	q31.2	3	0.5381	Gain	1	0.2	3	8	p23.3	1	0.128	Gain	1	0.128	1
10	q21.2	5	1.95	Gain	2.5	1	2	11	p15.4	3	0.778	Loss	1	0.3	3	8	p23.3	1	5.209	Loss	1	5.209	1
10	q26.11	5	1.38	Gain	2.5	0.7	2	12	p13.31	3	0.9239	Loss	1	0.3	3	8	q11.21	1	6.568	Loss	1	6.568	1
11	p15.4	5	0.87	Gain	2.5	0.4	2	12	q24.21	3	0.5755	Gain	1	0.2	3	8	q21.3	1	9.371	Loss	1	9.371	1
12	q23.1	5	1.04	Loss	2.5	0.5	2	16	q24.1	3	0.7275	Gain	1	0.2	3	8	q22.1	1	1.287	Loss	1	1.287	1
15	q21.3	5	0.93	Loss	2.5	0.5	2	17	q12	3	0.667	Gain	1	0.2	3	8	q24.12	1	2.487	Loss	1	2.487	1
16	q21	5	1.12	Loss	2.5	0.6	2	21	q22.3	3	0.5246	Gain	1	0.2	3	8	q24.21	1	11.164	Loss	1	11.164	1
18	q21.33	5	1.45	Loss	2.5	0.7	2	22	q12.1	3	0.8474	Loss	1	0.3	3	8	q24.3	1	8.046	Loss	1	8.046	1
20	q13.2	5	6.82	Gain	2.5	3.4	2	22	q11.1	3	0.5947	Loss	1	0.2	3	9	p13.2	1	2.61	Loss	1	2.61	1
2	p11.2	5	10.62	Gain	5	10.6	1	22	q11.22	3	0.5772	Gain	1	0.2	3	9	p21.1	1	5.432	Loss	1	5.432	1
2	q14.1	5	2.56	Gain	5	2.6	1	1	p35.3	3	1.8541	Loss	1.5	0.9	2	9	p22.2	1	8.322	Gain	1	8.322	1
2	q23.3	5	0.91	Gain	5	0.9	1	1	q25.3	3	0.7577	Gain	1.5	0.4	2	9	p24.3	1	4.903	Loss	1	4.903	1
3	q28	5	1.76	Gain	5	1.8	1	1	q42.12	3	0.7036	Gain	1.5	0.4	2	9	q22.2	1	4.396	Loss	1	4.396	1
3	q13.11	5	1.18	Gain	5	1.2	1	1	q21.3	3	0.4907	Loss	1.5	0.2	2	9	q22.31	1	14.132	Loss	1	14.132	1
3	p12.1	5	1.12	Gain	5	1.1	1	1	p31.3	3	0.457	Loss	1.5	0.2	2	9	q22.32	1	6.269	Loss	1	6.269	1
6	q23.3	5	2.55	Gain	5	2.5	1	1	q24.1	3	0.3319	Gain	1.5	0.2	2	9	q33.1	1	156.641	Loss	1	156.641	1
6	p25.1	5	1.7	Gain	5	1.7	1	2	q14.2	3	1.398	Gain	1.5	0.7	2	9	q33.3	1	6.085	Loss	1	6.085	1
7	q11.21	5	1.05	Loss	5	1.1	1	2	q33.2	3	0.8678	Loss	1.5	0.4	2	9	q34.2	1	24.315	Loss	1	24.315	1
11	q13.4	5	1.53	Gain	5	1.5	1	2	q35	3	0.8434	Gain	1.5	0.4	2	10	p12.2	1	10.217	Loss	1	10.217	1
12	p12.3	5	2.79	Gain	5	2.8	1	2	q21.3	3	0.6267	Loss	1.5	0.3	2	10	p12.33	1	98.462	Gain	1	98.462	1
18	p11.21	5	1.12	Gain	5	1.1	1	2	q21.2	3	0.5809	Gain	1.5	0.3	2	10	p14	1	6.249	Loss	1	6.249	1
1	q21.2	4	0.94	Gain	1	0.2	4	2	p21	3	0.5424	Gain	1.5	0.3	2	10	q11.23	1	62.785	Loss	1	62.785	1
4	p11	4	0.6	Loss	1	0.2	4	2	p25.1	3	0.4575	Gain	1.5	0.2	2	10	q22.3	1	7.307	Gain	1	7.307	1
7	q32.3	4	1.84	Gain	1	0.5	4	2	q13	3	0.4349	Gain	1.5	0.2	2	10	q24.2	1	6.059	Loss	1	6.059	1
7	p12.2	4	0.75	Gain	1	0.2	4	3	p14.3	3	0.6807	Loss	1.5	0.3	2	10	q25.2	1	6.397	Loss	1	6.397	1
12	q11	4	1.61	Loss	1	0.4	4	3	p22.3	3	0.4944	Loss	1.5	0.2	2	11	p12	1	7.47	Loss	1	7.47	1
14	q12	4	1.6	Loss	1	0.4	4	3	q22.1	3	0.4195	Gain	1.5	0.2	2	11	p13	1	3.302	Gain	1	3.302	1
14	q13.2	4	0.68	Loss	1	0.2	4	3	q13.33	3	0.3461	Loss	1.5	0.2	2	11	p13	1	3.703	Loss	1	3.703	1
15	q25.3	4	0.93	Gain	1	0.2	4	4	p16.3	3	0.5071	Gain	1.5	0.3	2	11	p15.2	1	4.782	Loss	1	4.782	1
18	q12.2	4	1.01	Gain	1	0.3	4	4	p15.2	3	0.4339	Loss	1.5	0.2	2	11	p15.5	1	1.221	Loss	1	1.221	1
1	q22	4	4.02	Gain	1.3	1.3	3	4	q22.1	3	0.3352	Loss	1.5	0.2	2	11	q13.2	1	8.809	Gain	1	8.809	1
1	p35.3	4	1.59	Loss	1.3	0.5	3	5	p15.32	3	0.9046	Gain	1.5	0.5	2	11	q22.3	1	13.516	Loss	1	13.516	1
2	q21.2	4	2.23	Gain	1.3	0.7	3	5	q13.3	3	0.7329	Gain	1.5	0.4	2	12	p12.1	1	5.028	Loss	1	5.028	1
2	p13.2	4	1.88	Gain	1.3	0.6	3	5	q31.2	3	0.7129	Gain	1.5	0.4	2	12	p12.2	1	6.565	Loss	1	6.565	1
2	q21.3	4	0.72	Loss	1.3	0.2	3	5	q23.1	3	0.4491	Loss	1.5	0.2	2	12	p13.2	1	30.257	Gain	1	30.257	1
3	p24.1	4	0.63	Loss	1.3	0.2	3	6	p21.2	3	1.2876	Gain	1.5	0.6	2	12	p13.33	1	12.685	Gain	1	12.685	1
4	q21.22	4	1.46	Loss	1.3	0.5	3	6	p21.1	3	0.697	Gain	1.5	0.3	2	12	q13.12	1	12.784	Loss	1	12.784	1
4	q31.1	4	1.16	Loss	1.3	0.4	3	6	q26	3	0.529	Loss	1.5	0.3	2	12	q14.3	1	4.011	Gain	1	4.011	1
4	q12	4	0.65	Loss	1.3	0.2	3	6	q25.2	3	0.4603	Loss	1.5	0.2	2	12	q22	1	6.915	Loss	1	6.915	1
4	p15.2	4	0.57	Loss	1.3	0.2	3	6	p23	3	0.4246	Loss	1.5	0.2	2	12	q23.2	1	6.884	Loss	1	6.884	1
6	q25.1	4	1.73	Loss	1.3	0.6	3	6	q22.31	3	0.4217	Loss	1.5	0.2	2	13	q12.2	1	5.722	Loss	1	5.722	1
7	p15.2	4	0.8	Gain	1.3	0.3	3	6	p12.3	3	0.362	Loss	1.5	0.2	2	13	q21.33	1	7.771	Loss	1	7.771	1
8	q13.1	4	1.38	Gain	1.3	0.5	3	6	q21	3	0.3598	Gain	1.5	0.2	2	13	q31.1	1	12.548	Loss	1	12.548	1
8	p23.2	4	0.55	Gain	1.3	0.2	3	7	q33	3	2.5686	Gain	1.5	1.3	2	13	q32.3	1	8.767	Gain	1	8.767	1
9	q21.33	4	1.89	Gain	1.3	0.6	3	7	q32.3	3	2.0087	Gain	1.5	1	2	14	q13.2	1	13.671	Loss	1	13.671	1
9	q32	4	1.52	Gain	1.3	0.5	3	7	q33	3	0.5986	Loss	1.5	0.3	2	14	q23.2	1	2.807	Loss	1	2.807	1
9	q31.3	4	0.6	Gain	1.3	0.2	3	8	p21.1	3	1.5323	Gain	1.5	0.8	2	14	q24.3	1	22.921	Loss	1	22.921	1
9	q21.13	4	0.5	Gain	1.3	0.2	3	8	q13.2	3	1.0518	Gain	1.5	0.5	2	14	q24.3	1	49.099	Gain	1	49.099	1
10	q22.2	4	1.62	Gain	1.3	0.5	3	8	p23.1	3	0.4235	Loss	1.5	0.2	2	14	q31.1	1	3.561	Loss	1	3.561	1
10	p14	4	0.99	Gain	1.3	0.3	3	9	q21.33	3	0.7888	Gain	1.5	0.4	2	14	q32.11	1	3.129	Loss	1	3.129	1
11	q24.2	4	1.76	Gain	1.3	0.6	3	9	q31.3	3	0.4528	Gain	1.5	0.2	2	14	q32.33	1	246.677	Loss	1	246.677	1
11	p13	4	0.85	Gain	1.3	0.3	3	9	p22.2	3	0.3891	Loss	1.5	0.2	2	15	q14	1	197.251	Loss	1	197.251	1
13	q13.1	4	0.91	Gain	1.3	0.3	3	10	q23.1	3	0.6942	Gain	1.5	0.3	2	15	q15.1	1	9.036	Loss	1	9.036	1
13	q21.1	4	0.58	Gain	1.3	0.2	3	10	p11.21	3	0.4769	Loss	1.5	0.2	2	15	q22.31	1	15.156	Loss	1	15.156	1
14	q13.1	4	2.09	Loss	1.3	0.7	3	10	p15.1	3	0.3884	Gain	1.5	0.2	2	15	q26.1	1	3.894	Loss	1	3.894	1
14	q13.1	4	1.3	Gain	1.3	0.4	3	11	q24.2	3	1.3862	Gain	1.5	0.7	2	16	p11.2	1	289.342	Gain	1	289.342	1
14	q24.2	4	0.97	Loss	1.3	0.3	3	12	p13.1	3	0.53	Gain	1.5	0.3	2	16	p13.11	1	76.922	Loss	1	76.922	1
15	q23	4	2.06	Gain	1.3	0.7	3	12	q24.33	3	0.4973	Loss	1.5	0.2	2	16	p13.12	1	5.466	Loss	1	5.466	1
15	q26.1	4	1.41	Gain	1.3	0.5	3	12	q23.2	3	0.4704	Loss	1.5	0.2	2	16	q21	1	4.034	Gain	1	4.034	1
20	p11.21	4	0.87	Gain	1.3	0.3	3	12	q23.1	3	0.3525	Gain	1.5	0.2	2	16	q23.1	1	15.708	Gain	1	15.708	1
X	p11.22	4	1.08	Gain	1.3	0.4	3	13	q32.2	3	0.9749	Gain	1.5	0.5	2	16	q23.2	1	7.497	Loss	1	7.497	1
X	p11.3	4	0.8	Gain	1.3	0.3	3	13	q14.11	3	0.5993	Loss	1.5	0.3	2	16	q23.3	1	8.678	Loss	1	8.678	1
X	p11.23	4	0.62	Gain	1.3	0.2	3	13	q12.11	3	0.5569	Loss	1.5	0.3	2	16	q24.1	1	12.656	Gain	1	12.656	1
2	p22.3	4	1.22	Loss	2	0.6	2	14	q13.1	3	1.0407	Loss	1.5	0.5	2	17	p11.2	1	226.933	Loss	1	226.933	1
2	p24.2	4	0.84	Gain	2	0.4	2	14	q24.2	3	0.9085	Gain	1.5	0.5	2	17	p12	1	1396.9	Loss	1	1396.9	1
2	p22.1	4	0.55	Gain	2	0.3	2	14	q23.3	3	0.8893	Loss	1.5	0.4	2	17	p13.3	1	14.998	Loss	1	14.998	1
4	q28.1	4	1.21	Loss	2	0.6	2	15	q22.31	3	0.7392	Loss	1.5	0.4	2	17	q12	1	120.749	Loss	1	120.749	1
4	q13.2	4	0.99	Gain	2	0.5	2	16	p11.2	3	1.4197	Loss	1.5	0.7	2	17	q21.2	1	9.827	Gain	1	9.827	1
4	q32.1	4	0.58	Loss	2	0.3	2	16	p11.2	3	0.7866	Gain	1.5	0.4	2	17	q21.31	1	2.28	Loss	1	2.28	1
5	q13.1	4	2.67	Loss	2	1.3	2	16	p12.1	3	0.6328	Loss	1.5	0.3	2	17	q21.31	1	596.342	Gain	1	596.342	1
5	q31.2	4	1.15	Loss	2	0.6	2	16	q21	3	0.4014	Loss	1.5	0.2	2	17	q23.1	1	4.038	Loss	1	4.038	1
5	p15.2	4	0.65	Gain	2	0.3	2	17	q22	3	0.4634	Gain	1.5	0.2	2	17	q24.1	1	8.057	Loss	1	8.057	1
6	q14.3	4	0.98	Loss	2	0.5	2	18	q12.3	3	0.7109	Gain	1.5	0.4	2	18	q11.1	1	111.142	Gain	1	111.142	1
6	p22.3	4	0.89	Loss	2	0.4	2	19	q13.12	3	1.4513	Loss	1.5	0.7	2	18	q11.2	1	6.679	Loss	1	6.679	1
6	q23.2	4	0.89	Loss	2	0.4	2	19	q13.42	3	0.4885	Loss	1.5	0.2	2	18	q12.2	1	0.743	Gain	1	0.743	1
7	q36.2	4	1.42	Gain	2	0.7	2	20	p11.22	3	2.9261	Gain	1.5	1.5	2	18	q21.2	1	0.487	Loss	1	0.487	1
7	p22.3	4	0.8	Gain	2	0.4	2	20	q13.13	3	1.0865	Gain	1.5	0.5	2	18	q21.2	1	6.451	Gain	1	6.451	1
8	q13.2	4	2.57	Gain	2	1.3	2	20	q13.2	3	1.036	Loss	1.5	0.5	2	18	q21.31	1	4.137	Gain	1	4.137	1
8	p11.21	4	1.37	Loss	2	0.7	2	22	q13.31	3	0.4724	Gain	1.5	0.2	2	18	q22.1	1	9.861	Loss	1	9.861	1
9	p13.3	4	0.62	Gain	2	0.3	2	X	q25	3	12.908	Loss	1.5	6.5	2	18	q23	1	16.925	Loss	1	16.925	1
10	q25.3	4	1.24	Gain	2	0.6	2	X	p21.1	3	0.5217	Gain	1.5	0.3	2	19	q13.2	1	5.355	Loss	1	5.355	1
10	p12.31	4	0.92	Loss	2	0.5	2	X	q22.3	3	0.414	Gain	1.5	0.2	2	19	q13.33	1	4.852	Loss	1	4.852	1
10	p14	4	0.76	Loss	2	0.4	2	1	q31.3	3	1.1866	Loss	3	1.2	1	19	q13.33	1	11.734	Gain	1	11.734	1
10	p13	4	0.63	Loss	2	0.3	2	1	q21.1	3	1.1667	Gain	3	1.2	1	19	q13.43	1	3.934	Loss	1	3.934	1
11	p11.12	4	9.16	Loss	2	4.6	2	1	q32.2	3	0.8792	Loss	3	0.9	1	20	p11.1	1	8.896	Loss	1	8.896	1
12	p11.21	4	0.79	Loss	2	0.4	2	1	q31.1	3	0.7652	Gain	3	0.8	1	20	p11.23	1	6.789	Gain	1	6.789	1
12	q14.1	4	0.53	Loss	2	0.3	2	1	q25.1	3	0.647	Loss	3	0.6	1	20	p12.1	1	18.657	Loss	1	18.657	1
13	q22.1	4	0.7	Gain	2	0.4	2	1	p22.1	3	0.5938	Loss	3	0.6	1	20	p13	1	37.224	Gain	1	37.224	1
14	q23.2	4	0.99	Loss	2	0.5	2	1	p31.1	3	0.4192	Gain	3	0.4	1	20	p13	1	37.224	Loss	1	37.224	1
15	q22.2	4	1.25	Gain	2	0.6	2	1	q42.3	3	0.3969	Loss	3	0.4	1	20	q13.33	1	17.781	Loss	1	17.781	1
15	q15.1	4	0.78	Loss	2	0.4	2	2	p23.3	3	0.7331	Loss	3	0.7	1	22	q12.1	1	7.373	Loss	1	7.373	1
17	q23.2	4	1.08	Loss	2	0.5	2	2	p21	3	0.4343	Loss	3	0.4	1	22	q12.1	1	7.407	Gain	1	7.407	1
17	q21.31	4	0.89	Loss	2	0.4	2	3	q27.1	3	0.6749	Gain	3	0.7	1	22	q12.3	1	17.417	Loss	1	17.417	1
22	q11.21	4	1.38	Loss	2	0.7	2	3	p24.3	3	0.531	Gain	3	0.5	1	22	q13.1	1	39.416	Loss	1	39.416	1
X	q22.3	4	0.67	Gain	2	0.3	2	3	p12.1	3	0.5154	Loss	3	0.5	1	22	q13.2	1	4.539	Loss	1	4.539	1
X	q22.1	4	0.62	Gain	2	0.3	2	4	q13.1	3	0.8588	Loss	3	0.9	1	22	q13.33	1	13.967	Loss	1	13.967	1
1	p34.3	4	1.05	Loss	4	1	1	4	q34.1	3	0.8171	Loss	3	0.8	1	X	p11.23	1	196.673	Loss	1	196.673	1
1	p36.11	4	0.58	Loss	4	0.6	1	4	q31.21	3	0.6466	Loss	3	0.6	1	X	p11.4	1	1.055	Gain	1	1.055	1
2	q33.1	4	2.87	Gain	4	2.9	1	4	q34.3	3	0.4446	Loss	3	0.4	1	X	p22.13	1	2.257	Loss	1	2.257	1
2	q36.1	4	2.8	Gain	4	2.8	1	5	q14.1	3	0.5241	Loss	3	0.5	1	X	q13.1	1	15.154	Gain	1	15.154	1
3	q22.1	4	1.95	Gain	4	2	1	5	p14.3	3	0.3953	Gain	3	0.4	1	X	q13.3	1	6.09	Gain	1	6.09	1
4	q22.1	4	0.82	Loss	4	0.8	1	6	q23.3	3	0.5974	Loss	3	0.6	1	X	q21.1	1	1.419	Loss	1	1.419	1
4	q24	4	0.79	Loss	4	0.8	1	7	q31.31	3	1.9957	Gain	3	2	1	X	q21.2	1	0.347	Loss	1	0.347	1
5	q13.3	4	0.99	Loss	4	1	1	7	q21.12	3	0.8123	Gain	3	0.8	1	X	q21.31	1	67.031	Gain	1	67.031	1
6	q12	4	0.73	Loss	4	0.7	1	7	q34	3	0.7756	Loss	3	0.8	1	X	q21.33	1	5.65	Loss	1	5.65	1
12	q22	4	3.58	Gain	4	3.6	1	7	p14.1	3	0.6719	Gain	3	0.7	1	X	q22.1	1	12.388	Loss	1	12.388	1
12	q24.23	4	1.43	Gain	4	1.4	1	7	q21.13	3	0.6481	Gain	3	0.6	1	X	q23	1	0.035	Loss	1	0.035	1
12	q24.11	4	0.6	Gain	4	0.6	1	7	q22.3	3	0.5307	Loss	3	0.5	1	X	q25	1	0.153	Loss	1	0.153	1
16	q12.1	4	1.85	Gain	4	1.8	1	8	p12	3	0.6023	Loss	3	0.6	1	X	q26.1	1	0.129	Loss	1	0.129	1
18	q22.1	4	3.84	Loss	4	3.8	1	9	q21.13	3	0.429	Loss	3	0.4	1	X	q27.2	1	19.877	Loss	1	19.877	1
18	p11.31	4	1.19	Gain	4	1.2	1	10	q26.2	3	1.5346	Gain	3	1.5	1	Y	p11.2	1	3.058	Gain	1	3.058	1
21	q22.11	4	0.92	Loss	4	0.9	1	12	q24.31	3	0.9967	Loss	3	1	1	Y	q11.23	1	47.27	Gain	1	47.27	1
X	p21.3	4	5.17	Gain	4	5.2	1	12	q13.12	3	0.6923	Loss	3	0.7	1
1	p36.33	3	0.74	Gain	1	0.2	3	13	q33.3	3	0.8092	Gain	3	0.8	1
3	p11.1	3	9.73	Loss	1	3.2	3	13	q31.3	3	0.5427	Gain	3	0.5	1
3	q23	3	1.75	Loss	1	0.6	3	13	q14.2	3	0.362	Loss	3	0.4	1
3	q29	3	0.61	Loss	1	0.2	3	14	q12	3	0.4117	Gain	3	0.4	1
3	q13.13	3	0.41	Loss	1	0.1	3	14	q24.1	3	0.3844	Gain	3	0.4	1
5	p11	3	6.84	Loss	1	2.3	3	15	q21.3	3	0.5897	Loss	3	0.6	1
5	q13.2	3	2.6	Loss	1	0.9	3	16	p13.3	3	1.3645	Gain	3	1.4	1
5	q33.3	3	0.9	Gain	1	0.3	3	16	q22.1	3	1.2536	Loss	3	1.3	1
7	p21.3	3	1.16	Gain	1	0.4	3	16	q24.3	3	0.6288	Gain	3	0.6	1
7	q21.11	3	0.53	Gain	1	0.2	3	16	q23.3	3	0.5092	Gain	3	0.5	1
7	p14.2	3	0.5	Gain	1	0.2	3	17	q25.1	3	0.4737	Loss	3	0.5	1
9	p24.2	3	0.89	Gain	1	0.3	3	17	p13.2	3	0.3531	Loss	3	0.4	1
10	q23.33	3	0.93	Loss	1	0.3	3	19	p13.11	3	0.4328	Loss	3	0.4	1
11	p15.4	3	0.69	Loss	1	0.2	3	19	q13.43	3	0.3805	Loss	3	0.4	1
12	p13.1	3	1.38	Gain	1	0.5	3	20	q11.22	3	0.3992	Loss	3	0.4	1
13	q12.2	3	0.67	Gain	1	0.2	3	21	q21.3	3	0.378	Loss	3	0.4	1
13	q31.3	3	0.4	Gain	1	0.1	3	X	q13.3	3	0.8674	Loss	3	0.9	1
13	q32.3	3	0.39	Gain	1	0.1	3	X	p11.21	3	0.4486	Loss	3	0.4	1
14	q22.1	3	0.55	Loss	1	0.2	3	X	p11.22	3	0.4444	Loss	3	0.4	1
15	q21.2	3	1.35	Loss	1	0.5	3	Y	q11.23	3	1.5127	Gain	3	1.5	1
15	q11.2	3	0.42	Gain	1	0.1	3	Y	q11.222	3	1.4958	Gain	3	1.5	1
16	q24.2	3	1.52	Gain	1	0.5	3	Y	q11.21	3	1.1518	Gain	3	1.2	1
16	p12.3	3	0.86	Gain	1	0.3	3	Y	q11.23	3	1.1296	Loss	3	1.1	1
16	p12.1	3	0.33	Loss	1	0.1	3	Y	q11.221	3	1.0307	Gain	3	1	1
17	q22	3	0.98	Loss	1	0.3	3	1	q21.2	2	0.8878	Gain	1	0.4	2
17	q12	3	0.57	Gain	1	0.2	3	1	q25.1	2	0.8743	Gain	1	0.4	2
17	q23.1	3	0.4	Loss	1	0.1	3	1	p35.1	2	0.7674	Gain	1	0.4	2
22	q12.1	3	1	Loss	1	0.3	3	1	p36.12	2	0.4014	Gain	1	0.2	2
X	p11.21	3	0.81	Gain	1	0.3	3	1	q42.13	2	0.2832	Loss	1	0.1	2
1	p35.2	3	0.57	Loss	1.5	0.3	2	1	p32.1	2	0.2627	Gain	1	0.1	2
1	q43	3	0.36	Loss	1.5	0.2	2	1	p22.1	2	0.2306	Gain	1	0.1	2
2	q12.1	3	2.32	Gain	1.5	1.2	2	2	p24.3	2	0.616	Gain	1	0.3	2
2	q12.3	3	1.02	Gain	1.5	0.5	2	2	q31.2	2	0.5634	Gain	1	0.3	2
2	p23.1	3	0.99	Gain	1.5	0.5	2	2	q12.3	2	0.434	Gain	1	0.2	2
2	p22.2	3	0.49	Loss	1.5	0.2	2	2	p13.3	2	0.4287	Loss	1	0.2	2
2	p21	3	0.48	Loss	1.5	0.2	2	2	q32.3	2	0.3577	Loss	1	0.2	2
3	p25.3	3	1.07	Gain	1.5	0.5	2	2	q23.2	2	0.338	Gain	1	0.2	2
4	q32.2	3	0.79	Loss	1.5	0.4	2	2	q14.3	2	0.3238	Loss	1	0.2	2
4	p16.3	3	0.54	Gain	1.5	0.3	2	2	q34	2	0.3174	Gain	1	0.2	2
5	p15.32	3	1.52	Gain	1.5	0.8	2	2	q36.3	2	0.305	Loss	1	0.2	2
5	p13.2	3	0.79	Loss	1.5	0.4	2	2	q36.1	2	0.3047	Loss	1	0.2	2
5	q31.1	3	0.73	Gain	1.5	0.4	2	2	q32.3	2	0.2843	Gain	1	0.1	2
6	p25.3	3	1.99	Gain	1.5	1	2	2	q35	2	0.2662	Loss	1	0.1	2
6	p21.31	3	0.65	Loss	1.5	0.3	2	2	q34	2	0.2435	Loss	1	0.1	2
7	p15.3	3	1.37	Gain	1.5	0.7	2	2	p23.1	2	0.2398	Loss	1	0.1	2
7	q21.3	3	0.62	Gain	1.5	0.3	2	2	p11.2	2	0.23	Loss	1	0.1	2
7	q22.3	3	0.54	Loss	1.5	0.3	2	3	p11.1	2	6.5033	Loss	1	3.3	2
8	p11.23	3	0.85	Gain	1.5	0.4	2	3	q22.2	2	0.797	Gain	1	0.4	2
9	q34.13	3	2.66	Gain	1.5	1.3	2	3	p21.31	2	0.6439	Gain	1	0.3	2
9	p13.3	3	1.01	Loss	1.5	0.5	2	3	q13.13	2	0.5991	Loss	1	0.3	2
9	p22.3	3	0.78	Gain	1.5	0.4	2	3	p25.2	2	0.3426	Gain	1	0.2	2
9	p21.3	3	0.66	Gain	1.5	0.3	2	3	q13.31	2	0.3395	Gain	1	0.2	2
9	p21.2	3	0.5	Gain	1.5	0.3	2	3	p24.1	2	0.3222	Gain	1	0.2	2
9	p13.2	3	0.49	Gain	1.5	0.2	2	3	p26.1	2	0.3077	Gain	1	0.2	2
11	q12.1	3	0.63	Gain	1.5	0.3	2	3	p22.1	2	0.3033	Loss	1	0.2	2
11	p12	3	0.45	Gain	1.5	0.2	2	3	p21.2	2	0.2637	Loss	1	0.1	2
12	q23.2	3	0.63	Loss	1.5	0.3	2	3	p14.1	2	0.2052	Gain	1	0.1	2
12	q13.3	3	0.59	Loss	1.5	0.3	2	4	q33	2	0.9462	Loss	1	0.5	2
14	q11.2	3	0.41	Gain	1.5	0.2	2	4	q35.2	2	0.6433	Loss	1	0.3	2
16	q12.2	3	1.67	Gain	1.5	0.8	2	4	q21.22	2	0.493	Loss	1	0.2	2
16	p13.2	3	1.62	Gain	1.5	0.8	2	5	q13.1	2	2.3102	Loss	1	1.2	2
16	q23.1	3	1.17	Gain	1.5	0.6	2	5	q31.3	2	0.7268	Loss	1	0.4	2
16	q22.2	3	0.7	Loss	1.5	0.3	2	5	p13.2	2	0.6085	Loss	1	0.3	2
16	q23.2	3	0.66	Gain	1.5	0.3	2	5	q33.3	2	0.5042	Gain	1	0.3	2
17	q12	3	0.51	Loss	1.5	0.3	2	5	q23.3	2	0.4205	Loss	1	0.2	2
19	q13.41	3	0.78	Gain	1.5	0.4	2	5	q23.2	2	0.3651	Loss	1	0.2	2
20	q12	3	2.32	Gain	1.5	1.2	2	5	q31.2	2	0.3055	Loss	1	0.2	2
X	q26.1	3	1.7	Gain	1.5	0.8	2	5	q12.3	2	0.248	Gain	1	0.1	2
X	p22.12	3	0.49	Gain	1.5	0.2	2	6	p11.1	2	6.5665	Loss	1	3.3	2
Y	q11.221	3	1.92	Loss	1.5	1	2	6	q24.2	2	0.2482	Gain	1	0.1	2
1	p22.1	3	1.43	Loss	3	1.4	1	6	q16.3	2	0.2471	Loss	1	0.1	2
2	q24.2	3	6.65	Gain	3	6.6	1	6	p22.1	2	0.2444	Loss	1	0.1	2
2	q22.3	3	3.17	Gain	3	3.2	1	6	q25.3	2	0.2399	Gain	1	0.1	2
2	p14	3	2.94	Gain	3	2.9	1	7	q31.33	2	0.5862	Loss	1	0.3	2
2	q22.2	3	1.96	Gain	3	2	1	7	p12.2	2	0.3732	Gain	1	0.2	2
2	q13	3	1.69	Gain	3	1.7	1	7	p22.3	2	0.3091	Loss	1	0.2	2
2	p21	3	0.77	Gain	3	0.8	1	7	p21.3	2	0.2834	Gain	1	0.1	2
2	p23.3	3	0.62	Loss	3	0.6	1	7	p12.1	2	0.2756	Gain	1	0.1	2
2	q21.1	3	0.57	Gain	3	0.6	1	8	p11.1	2	6.6906	Loss	1	3.3	2
3	q21.1	3	1.55	Gain	3	1.6	1	8	q21.12	2	1.4164	Gain	1	0.7	2
3	q26.31	3	1.23	Gain	3	1.2	1	8	q11.1	2	1.0683	Gain	1	0.5	2
3	q11.2	3	1.22	Gain	3	1.2	1	9	q33.3	2	0.7244	Loss	1	0.4	2
3	q26.1	3	1.19	Gain	3	1.2	1	9	p22.1	2	0.4343	Loss	1	0.2	2
3	q26.33	3	1.16	Gain	3	1.2	1	9	p21.2	2	0.4114	Loss	1	0.2	2
3	p12.2	3	0.89	Gain	3	0.9	1	9	q31.1	2	0.3789	Loss	1	0.2	2
3	q26.32	3	0.79	Gain	3	0.8	1	9	p24.2	2	0.2313	Gain	1	0.1	2
3	q29	3	0.76	Gain	3	0.8	1	10	p14	2	0.5455	Gain	1	0.3	2
3	p24.3	3	0.71	Loss	3	0.7	1	10	q11.21	2	0.4685	Gain	1	0.2	2
3	q25.1	3	0.7	Gain	3	0.7	1	10	q24.33	2	0.2393	Loss	1	0.1	2
3	p25.3	3	0.6	Loss	3	0.6	1	11	q21	2	0.3496	Gain	1	0.2	2
3	q13.2	3	0.42	Gain	3	0.4	1	11	q23.2	2	0.2837	Gain	1	0.1	2
4	q31.21	3	0.52	Loss	3	0.5	1	11	p13	2	0.2829	Loss	1	0.1	2
5	q23.3	3	3.28	Loss	3	3.3	1	11	q14.1	2	0.2586	Loss	1	0.1	2
5	q22.2	3	1.62	Loss	3	1.6	1	11	p15.4	2	0.2502	Gain	1	0.1	2
5	p13.3	3	1.13	Loss	3	1.1	1	12	p13.32	2	1.2663	Gain	1	0.6	2
5	q31.3	3	0.67	Loss	3	0.7	1	12	q11	2	1.1274	Loss	1	0.6	2
5	q32	3	0.47	Loss	3	0.5	1	12	q14.1	2	0.3547	Loss	1	0.2	2
5	p14.1	3	0.4	Loss	3	0.4	1	12	q24.12	2	0.3155	Loss	1	0.2	2
6	q22.1	3	0.56	Loss	3	0.6	1	12	p13.2	2	0.2094	Gain	1	0.1	2
7	q34	3	0.72	Loss	3	0.7	1	13	q21.33	2	2.1589	Gain	1	1.1	2
8	p22	3	0.64	Loss	3	0.6	1	13	q14.3	2	0.3551	Gain	1	0.2	2
8	p23.1	3	0.39	Loss	3	0.4	1	13	q32.1	2	0.3242	Loss	1	0.2	2
9	q31.3	3	0.71	Loss	3	0.7	1	13	q14.2	2	0.2465	Gain	1	0.1	2
10	q22.2	3	1.04	Loss	3	1	1	14	q32.2	2	0.9104	Loss	1	0.5	2
11	q22.1	3	0.77	Loss	3	0.8	1	14	q13.2	2	0.4068	Loss	1	0.2	2
11	p13	3	0.4	Loss	3	0.4	1	14	q21.2	2	0.3631	Loss	1	0.2	2
12	q21.31	3	3.05	Gain	3	3.1	1	14	q11.2	2	0.3281	Loss	1	0.2	2
12	q22	3	1.39	Loss	3	1.4	1	14	q11.2	2	0.3105	Gain	1	0.2	2
12	q24.11	3	1.28	Loss	3	1.3	1	15	q15.3	2	0.7314	Loss	1	0.4	2
12	q13.11	3	1.14	Gain	3	1.1	1	15	q24.3	2	0.4645	Gain	1	0.2	2
12	p11.22	3	0.91	Gain	3	0.9	1	15	q14	2	0.381	Gain	1	0.2	2
12	p13.2	3	0.58	Gain	3	0.6	1	15	q21.3	2	0.3572	Gain	1	0.2	2
12	q21.31	3	0.55	Loss	3	0.6	1	15	q15.2	2	0.2974	Loss	1	0.1	2
13	q12.13	3	0.96	Gain	3	1	1	15	q22.31	2	0.247	Gain	1	0.1	2
13	q14.2	3	0.44	Loss	3	0.4	1	15	q21.2	2	0.2116	Gain	1	0.1	2
14	q32.13	3	0.52	Gain	3	0.5	1	16	q23.2	2	0.8296	Gain	1	0.4	2
16	p13.12	3	1.09	Gain	3	1.1	1	16	q24.2	2	0.508	Gain	1	0.3	2
16	q21	3	0.84	Gain	3	0.8	1	16	p13.2	2	0.3317	Loss	1	0.2	2
16	q12.1	3	0.46	Loss	3	0.5	1	16	p13.11	2	0.3087	Loss	1	0.2	2
17	q24.3	3	0.81	Gain	3	0.8	1	17	p13.1	2	0.2346	Gain	1	0.1	2
18	q22.2	3	3.37	Loss	3	3.4	1	18	q12.1	2	0.3432	Loss	1	0.2	2
18	p11.22	3	0.99	Gain	3	1	1	18	q12.1	2	0.3048	Gain	1	0.2	2
18	q11.2	3	0.96	Gain	3	1	1	18	q21.1	2	0.236	Loss	1	0.1	2
19	q13.12	3	1.52	Loss	3	1.5	1	18	q11.1	2	0.2211	Loss	1	0.1	2
19	q13.43	3	0.93	Gain	3	0.9	1	18	p11.31	2	0.2144	Gain	1	0.1	2
19	p13.12	3	0.93	Loss	3	0.9	1	19	q13.2	2	0.2678	Loss	1	0.1	2
19	q13.2	3	0.83	Loss	3	0.8	1	20	q13.31	2	2.237	Gain	1	1.1	2
19	q13.11	3	0.79	Loss	3	0.8	1	20	p12.1	2	0.4641	Loss	1	0.2	2
21	q21.2	3	0.65	Loss	3	0.7	1	21	q22.12	2	0.5677	Loss	1	0.3	2
1	p32.2	2	0.39	Gain	1	0.2	2	21	q21.1	2	0.2569	Loss	1	0.1	2
1	p34.3	2	0.37	Gain	1	0.2	2	22	q11.21	2	0.5009	Gain	1	0.3	2
1	p31.3	2	0.3	Gain	1	0.1	2	22	q11.23	2	0.3738	Loss	1	0.2	2
1	p35.2	2	0.3	Gain	1	0.1	2	22	q11.21	2	0.3327	Loss	1	0.2	2
1	p22.3	2	0.29	Gain	1	0.1	2	22	q13.1	2	0.3055	Loss	1	0.2	2
2	q37.3	2	3.51	Gain	1	1.8	2	X	p22.13	2	11.08	Loss	1	5.5	2
2	p23.2	2	1.03	Gain	1	0.5	2	X	p11.4	2	9.378	Loss	1	4.7	2
2	q32.1	2	0.69	Loss	1	0.3	2	X	q13.1	2	8.953	Loss	1	4.5	2
2	p22.3	2	0.41	Gain	1	0.2	2	X	q26.3	2	4.4042	Loss	1	2.2	2
2	q33.2	2	0.28	Loss	1	0.1	2	X	q23	2	0.3558	Gain	1	0.2	2
3	p21.2	2	0.43	Loss	1	0.2	2	X	p11.22	2	0.3374	Gain	1	0.2	2
3	q26.2	2	0.36	Loss	1	0.2	2	1	q42.13	2	2.0751	Gain	2	2.1	1
3	p14.2	2	0.36	Loss	1	0.2	2	1	q41	2	1.792	Gain	2	1.8	1
3	q25.2	2	0.33	Loss	1	0.2	2	1	q32.2	2	0.9295	Gain	2	0.9	1
3	q26.32	2	0.3	Loss	1	0.1	2	1	p36.13	2	0.6279	Gain	2	0.6	1
3	p26.3	2	0.27	Gain	1	0.1	2	1	q43	2	0.4432	Gain	2	0.4	1
4	q21.23	2	0.33	Loss	1	0.2	2	1	p21.2	2	0.3887	Loss	2	0.4	1
5	q21.3	2	0.49	Gain	1	0.2	2	1	p34.1	2	0.3472	Loss	2	0.3	1
6	q27	2	0.51	Gain	1	0.3	2	1	p13.2	2	0.3207	Loss	2	0.3	1
6	p23	2	0.36	Gain	1	0.2	2	1	q25.2	2	0.3091	Loss	2	0.3	1
7	p14.1	2	0.73	Loss	1	0.4	2	1	p36.13	2	0.2813	Loss	2	0.3	1
7	p11.2	2	0.7	Gain	1	0.4	2	1	q25.3	2	0.2715	Loss	2	0.3	1
7	q32.1	2	0.61	Gain	1	0.3	2	1	p35.1	2	0.2409	Loss	2	0.2	1
7	q21.3	2	0.54	Loss	1	0.3	2	2	p24.1	2	0.9224	Gain	2	0.9	1
7	q33	2	0.49	Loss	1	0.2	2	2	p25.3	2	0.7962	Loss	2	0.8	1
7	q11.22	2	0.41	Gain	1	0.2	2	2	p15	2	0.7708	Loss	2	0.8	1
7	q31.32	2	0.23	Gain	1	0.1	2	2	p22.2	2	0.412	Loss	2	0.4	1
8	q21.2	2	1.02	Gain	1	0.5	2	2	q31.2	2	0.2742	Loss	2	0.3	1
8	q12.2	2	0.79	Gain	1	0.4	2	2	q24.3	2	0.2667	Loss	2	0.3	1
8	p11.23	2	0.47	Loss	1	0.2	2	2	p16.2	2	0.246	Loss	2	0.2	1
8	q13.3	2	0.32	Loss	1	0.2	2	2	p11.2	2	0.2404	Gain	2	0.2	1
8	p11.22	2	0.28	Gain	1	0.1	2	2	q21.2	2	0.2025	Loss	2	0.2	1
8	p12	2	0.26	Gain	1	0.1	2	3	q21.2	2	0.4932	Gain	2	0.5	1
9	q21.31	2	1.05	Gain	1	0.5	2	3	p14.2	2	0.4589	Loss	2	0.5	1
9	q33.3	2	0.71	Loss	1	0.4	2	3	q22.3	2	0.411	Gain	2	0.4	1
9	p23	2	0.7	Loss	1	0.3	2	3	p14.3	2	0.2355	Gain	2	0.2	1
9	q22.31	2	0.55	Gain	1	0.3	2	3	p24.2	2	0.2343	Gain	2	0.2	1
9	q31.1	2	0.49	Loss	1	0.2	2	4	p12	2	0.2888	Loss	2	0.3	1
9	p24.1	2	0.38	Loss	1	0.2	2	4	q21.1	2	0.2087	Loss	2	0.2	1
9	p22.2	2	0.37	Gain	1	0.2	2	5	q35.1	2	0.666	Gain	2	0.7	1
9	p22.1	2	0.31	Loss	1	0.2	2	5	q34	2	0.4809	Gain	2	0.5	1
9	p22.3	2	0.31	Loss	1	0.2	2	5	q21.1	2	0.3738	Loss	2	0.4	1
9	q22.32	2	0.23	Gain	1	0.1	2	5	q12.3	2	0.325	Loss	2	0.3	1
10	q22.1	2	1.63	Loss	1	0.8	2	5	q35.3	2	0.2813	Gain	2	0.3	1
10	q25.1	2	1.53	Gain	1	0.8	2	5	q33.2	2	0.2632	Loss	2	0.3	1
10	q24.2	2	0.89	Gain	1	0.4	2	6	q14.3	2	0.71	Loss	2	0.7	1
10	p15.1	2	0.67	Gain	1	0.3	2	6	p21.31	2	0.374	Loss	2	0.4	1
10	q21.3	2	0.56	Gain	1	0.3	2	6	p22.3	2	0.369	Loss	2	0.4	1
10	q11.23	2	0.39	Gain	1	0.2	2	7	q21.2	2	1.8115	Gain	2	1.8	1
10	p11.22	2	0.36	Loss	1	0.2	2	7	q22.3	2	0.7167	Gain	2	0.7	1
10	q23.2	2	0.35	Loss	1	0.2	2	7	q36.1	2	0.5922	Loss	2	0.6	1
10	p12.2	2	0.33	Loss	1	0.2	2	7	q31.33	2	0.5481	Gain	2	0.5	1
10	q23.2	2	0.26	Gain	1	0.1	2	7	p22.1	2	0.3794	Gain	2	0.4	1
10	p12.1	2	0.23	Gain	1	0.1	2	7	p14.3	2	0.2919	Loss	2	0.3	1
11	q14.3	2	0.22	Gain	1	0.1	2	7	q32.3	2	0.2831	Loss	2	0.3	1
12	q24.12	2	1.17	Loss	1	0.6	2	7	p15.3	2	0.2582	Loss	2	0.3	1
12	p13.31	2	0.74	Gain	1	0.4	2	8	p11.21	2	0.7295	Loss	2	0.7	1
12	p12.3	2	0.21	Loss	1	0.1	2	8	q13.1	2	0.723	Loss	2	0.7	1
13	q31.1	2	0.92	Loss	1	0.5	2	8	q13.3	2	0.4677	Loss	2	0.5	1
13	q13.2	2	0.36	Gain	1	0.2	2	8	q22.2	2	0.276	Loss	2	0.3	1
13	q32.2	2	0.22	Gain	1	0.1	2	9	q33.1	2	0.8957	Gain	2	0.9	1
14	q21.1	2	0.31	Loss	1	0.2	2	9	p13.3	2	0.5782	Loss	2	0.6	1
14	q32.12	2	0.3	Loss	1	0.2	2	9	q21.32	2	0.4715	Gain	2	0.5	1
14	q32.11	2	0.26	Loss	1	0.1	2	9	p13.2	2	0.3825	Gain	2	0.4	1
15	q15.3	2	0.66	Loss	1	0.3	2	9	q31.3	2	0.314	Loss	2	0.3	1
15	q24.3	2	0.54	Gain	1	0.3	2	9	q34.11	2	0.3104	Loss	2	0.3	1
15	q15.2	2	0.34	Loss	1	0.2	2	9	p13.3	2	0.2845	Gain	2	0.3	1
17	q11.2	2	2.08	Gain	1	1	2	9	q22.33	2	0.283	Gain	2	0.3	1
17	q24.2	2	0.37	Loss	1	0.2	2	9	q22.31	2	0.2531	Gain	2	0.3	1
20	q13.31	2	4.07	Gain	1	2	2	10	q11.22	2	2.1288	Gain	2	2.1	1
21	q22.12	2	0.63	Loss	1	0.3	2	10	q26.11	2	0.4523	Gain	2	0.5	1
22	q11.1	2	0.88	Loss	1	0.4	2	10	p12.1	2	0.4175	Loss	2	0.4	1
X	p21.2	2	1.72	Gain	1	0.9	2	10	p13	2	0.3268	Loss	2	0.3	1
1	p36.21	2	0.91	Gain	2	0.9	1	10	p11.22	2	0.3155	Loss	2	0.3	1
1	p12	2	0.72	Loss	2	0.7	1	10	q25.1	2	0.302	Gain	2	0.3	1
1	p22.2	2	0.62	Loss	2	0.6	1	10	q22.2	2	0.289	Loss	2	0.3	1
1	p13.2	2	0.46	Gain	2	0.5	1	11	p13	2	0.2614	Gain	2	0.3	1
1	p31.1	2	0.46	Gain	2	0.5	1	12	q23.3	2	0.7189	Gain	2	0.7	1
1	p13.3	2	0.45	Gain	2	0.5	1	12	q24.32	2	0.6624	Loss	2	0.7	1
1	p34.2	2	0.41	Loss	2	0.4	1	12	q24.31	2	0.3301	Gain	2	0.3	1
1	q32.1	2	0.4	Loss	2	0.4	1	12	q24.13	2	0.3259	Loss	2	0.3	1
1	p36.22	2	0.38	Gain	2	0.4	1	12	p13.2	2	0.2672	Loss	2	0.3	1
1	q42.3	2	0.3	Loss	2	0.3	1	14	q21.3	2	0.6401	Loss	2	0.6	1
2	q32.2	2	2.92	Gain	2	2.9	1	14	q12	2	0.6375	Loss	2	0.6	1
2	q36.2	2	2.29	Gain	2	2.3	1	14	q32.2	2	0.3555	Gain	2	0.4	1
2	q37.2	2	2.25	Gain	2	2.3	1	14	q21.3	2	0.3518	Gain	2	0.4	1
2	q32.3	2	2.02	Gain	2	2	1	14	q32.13	2	0.3307	Gain	2	0.3	1
2	p16.2	2	1.32	Gain	2	1.3	1	14	q24.1	2	0.3272	Loss	2	0.3	1
2	p13.3	2	0.91	Gain	2	0.9	1	14	q23.3	2	0.2858	Gain	2	0.3	1
2	p15	2	0.53	Loss	2	0.5	1	15	q25.1	2	0.474	Gain	2	0.5	1
2	p16.3	2	0.46	Gain	2	0.5	1	15	q26.1	2	0.46	Gain	2	0.5	1
2	p22.1	2	0.38	Loss	2	0.4	1	15	q26.1	2	0.3352	Loss	2	0.3	1
3	q25.31	2	1.43	Gain	2	1.4	1	16	q23.1	2	0.5053	Loss	2	0.5	1
3	q13.13	2	1.27	Gain	2	1.3	1	16	p12.2	2	0.5009	Loss	2	0.5	1
3	q22.3	2	0.85	Gain	2	0.9	1	16	p12.3	2	0.3712	Loss	2	0.4	1
3	q27.2	2	0.78	Gain	2	0.8	1	16	q12.2	2	0.311	Loss	2	0.3	1
3	q27.3	2	0.76	Gain	2	0.8	1	16	p13.12	2	0.2604	Loss	2	0.3	1
3	q12.1	2	0.55	Gain	2	0.6	1	17	q24.2	2	0.3655	Loss	2	0.4	1
3	p22.1	2	0.48	Loss	2	0.5	1	17	q25.3	2	0.3254	Loss	2	0.3	1
3	p22.2	2	0.26	Loss	2	0.3	1	17	p13.3	2	0.2826	Loss	2	0.3	1
4	q21.21	2	1.75	Gain	2	1.7	1	17	q24.1	2	0.2209	Loss	2	0.2	1
4	q12	2	0.54	Gain	2	0.5	1	17	p11.2	2	0.2182	Gain	2	0.2	1
4	q21.1	2	0.47	Gain	2	0.5	1	17	p13.3	2	0.2154	Gain	2	0.2	1
4	q21.3	2	0.46	Loss	2	0.5	1	18	q23	2	0.7903	Gain	2	0.8	1
4	p15.32	2	0.44	Gain	2	0.4	1	18	q21.31	2	0.3056	Gain	2	0.3	1
4	q23	2	0.24	Loss	2	0.2	1	18	p11.21	2	0.2659	Loss	2	0.3	1
5	q21.1	2	3.02	Loss	2	3	1	18	p11.32	2	0.2107	Loss	2	0.2	1
5	q21.2	2	1.44	Loss	2	1.4	1	19	q13.41	2	0.2553	Loss	2	0.3	1
5	q22.3	2	0.84	Loss	2	0.8	1	20	q11.21	2	0.2808	Loss	2	0.3	1
5	q12.1	2	0.68	Loss	2	0.7	1	21	q21.2	2	0.4302	Loss	2	0.4	1
5	q22.1	2	0.67	Loss	2	0.7	1	22	q12.3	2	0.2306	Loss	2	0.2	1
5	p15.1	2	0.55	Loss	2	0.5	1	X	q22.3	2	3.2071	Loss	2	3.2	1
5	q35.2	2	0.48	Loss	2	0.5	1	X	q11.2	2	0.5238	Loss	2	0.5	1
5	q35.1	2	0.28	Gain	2	0.3	1	X	q25	2	0.413	Gain	2	0.4	1
5	q35.3	2	0.24	Loss	2	0.2	1	X	p21.3	2	0.3986	Gain	2	0.4	1
6	p25.2	2	0.98	Gain	2	1	1	X	q13.2	2	0.3459	Loss	2	0.3	1
6	p21.1	2	0.74	Gain	2	0.7	1	X	p22.12	2	0.3076	Gain	2	0.3	1
6	q23.3	2	0.56	Loss	2	0.6	1	X	q26.3	2	0.3047	Gain	2	0.3	1
6	q24.1	2	0.54	Loss	2	0.5	1	X	p11.21	2	0.2709	Gain	2	0.3	1
6	p24.3	2	0.44	Gain	2	0.4	1	X	p22.33	2	0.2312	Gain	2	0.2	1
6	p22.2	2	0.3	Gain	2	0.3	1	X	p11.3	2	0.2308	Gain	2	0.2	1
6	q25.3	2	0.27	Loss	2	0.3	1	Y	q11.223	2	1.3779	Gain	2	1.4	1
6	p12.3	2	0.27	Gain	2	0.3	1	Y	q11.21	2	0.3042	Loss	2	0.3	1
6	p23	2	0.27	Loss	2	0.3	1	1	q44	1	1.0669	Gain	1	1.1	1
7	p11.2	2	4.95	Loss	2	5	1	1	p35.3	1	1.0539	Gain	1	1.1	1
7	p22.2	2	0.65	Gain	2	0.7	1	1	q42.2	1	0.6697	Gain	1	0.7	1
7	q36.1	2	0.59	Loss	2	0.6	1	1	p12	1	0.3283	Gain	1	0.3	1
7	p13	2	0.27	Gain	2	0.3	1	1	q32.3	1	0.3165	Gain	1	0.3	1
7	p21.1	2	0.27	Gain	2	0.3	1	1	q23.2	1	0.3162	Gain	1	0.3	1
8	q11.1	2	0.62	Gain	2	0.6	1	1	p32.3	1	0.3038	Gain	1	0.3	1
8	p21.2	2	0.36	Loss	2	0.4	1	1	p36.21	1	0.2823	Loss	1	0.3	1
8	p21.1	2	0.34	Loss	2	0.3	1	1	q42.11	1	0.26	Loss	1	0.3	1
8	q13.1	2	0.25	Loss	2	0.2	1	1	q24.2	1	0.2596	Gain	1	0.3	1
9	p24.1	2	0.37	Gain	2	0.4	1	1	p36.31	1	0.1997	Gain	1	0.2	1
9	q21.13	2	0.33	Loss	2	0.3	1	1	p34.1	1	0.1494	Gain	1	0.1	1
10	q26.12	2	1.1	Gain	2	1.1	1	1	p22.3	1	0.1442	Gain	1	0.1	1
10	q24.32	2	0.52	Loss	2	0.5	1	1	q24.3	1	0.1429	Loss	1	0.1	1
10	q24.1	2	0.34	Loss	2	0.3	1	1	q21.2	1	0.1332	Loss	1	0.1	1
10	p12.33	2	0.28	Loss	2	0.3	1	1	p32.2	1	0.1292	Loss	1	0.1	1
11	q13.3	2	1.02	Gain	2	1	1	1	p36.31	1	0.1241	Loss	1	0.1	1
11	q13.5	2	0.47	Gain	2	0.5	1	1	p35.2	1	0.1213	Gain	1	0.1	1
11	q24.3	2	0.46	Gain	2	0.5	1	1	p36.21	1	0.1164	Gain	1	0.1	1
11	q24.1	2	0.32	Loss	2	0.3	1	1	q22	1	0.1153	Loss	1	0.1	1
12	q24.13	2	1.33	Gain	2	1.3	1	1	p21.3	1	0.1127	Gain	1	0.1	1
12	q24.31	2	1.13	Gain	2	1.1	1	1	p36.22	1	0.107	Gain	1	0.1	1
12	q21.2	2	0.82	Loss	2	0.8	1	2	q22.3	1	0.3527	Gain	1	0.4	1
12	q24.22	2	0.7	Gain	2	0.7	1	2	p23.2	1	0.3472	Gain	1	0.3	1
12	q24.23	2	0.64	Loss	2	0.6	1	2	q31.1	1	0.31	Gain	1	0.3	1
12	q15	2	0.54	Gain	2	0.5	1	2	p23.1	1	0.2919	Gain	1	0.3	1
12	q24.33	2	0.44	Loss	2	0.4	1	2	p13.2	1	0.2852	Gain	1	0.3	1
12	q21.1	2	0.37	Loss	2	0.4	1	2	q24.2	1	0.2422	Loss	1	0.2	1
12	p12.2	2	0.37	Gain	2	0.4	1	2	p25.2	1	0.2381	Gain	1	0.2	1
12	q15	2	0.33	Loss	2	0.3	1	2	p12	1	0.238	Gain	1	0.2	1
12	q24.21	2	0.31	Loss	2	0.3	1	2	p22.3	1	0.2274	Gain	1	0.2	1
13	q21.32	2	0.45	Gain	2	0.5	1	2	q13	1	0.2148	Loss	1	0.2	1
14	q22.1	2	0.31	Gain	2	0.3	1	2	p24.3	1	0.2023	Loss	1	0.2	1
15	q14	2	0.55	Gain	2	0.6	1	2	p12	1	0.1889	Loss	1	0.2	1
15	q14	2	0.5	Loss	2	0.5	1	2	q11.2	1	0.1795	Loss	1	0.2	1
15	q22.31	2	0.34	Loss	2	0.3	1	2	p22.2	1	0.178	Gain	1	0.2	1
16	q24.1	2	1.58	Gain	2	1.6	1	2	p13.3	1	0.1767	Gain	1	0.2	1
16	q23.1	2	1.28	Loss	2	1.3	1	2	p24.1	1	0.1734	Loss	1	0.2	1
16	p13.13	2	0.76	Gain	2	0.8	1	2	q14.2	1	0.1532	Loss	1	0.2	1
16	q12.2	2	0.55	Loss	2	0.5	1	2	q23.3	1	0.1527	Loss	1	0.2	1
16	q23.3	2	0.44	Gain	2	0.4	1	2	q33.3	1	0.1466	Loss	1	0.1	1
17	q25.1	2	0.77	Gain	2	0.8	1	2	q24.2	1	0.141	Gain	1	0.1	1
17	q22	2	0.28	Gain	2	0.3	1	2	q24.1	1	0.1337	Gain	1	0.1	1
18	q21.32	2	1.86	Loss	2	1.9	1	2	p24.2	1	0.1303	Loss	1	0.1	1
18	q22.3	2	0.88	Gain	2	0.9	1	2	p25.2	1	0.1224	Loss	1	0.1	1
18	p11.23	2	0.79	Gain	2	0.8	1	2	q22.1	1	0.1196	Loss	1	0.1	1
18	q23	2	0.57	Loss	2	0.6	1	2	q37.2	1	0.1187	Gain	1	0.1	1
18	q21.31	2	0.56	Loss	2	0.6	1	2	q31.3	1	0.1169	Loss	1	0.1	1
18	q21.1	2	0.47	Loss	2	0.5	1	2	q31.3	1	0.116	Gain	1	0.1	1
18	q12.3	2	0.26	Gain	2	0.3	1	2	q22.2	1	0.1145	Loss	1	0.1	1
19	q12	2	1.13	Gain	2	1.1	1	2	q14.1	1	0.1092	Loss	1	0.1	1
19	q13.42	2	0.44	Gain	2	0.4	1	2	q11.2	1	0.1053	Gain	1	0.1	1
20	q11.22	2	0.24	Gain	2	0.2	1	2	q24.3	1	0.1049	Gain	1	0.1	1
21	q21.1	2	0.59	Loss	2	0.6	1	3	q21.1	1	0.7122	Gain	1	0.7	1
21	q21.3	2	0.46	Loss	2	0.5	1	3	q23	1	0.5589	Loss	1	0.6	1
21	q22.3	2	0.39	Gain	2	0.4	1	3	q12.3	1	0.3338	Loss	1	0.3	1
21	q22.13	2	0.28	Loss	2	0.3	1	3	q26.2	1	0.3183	Gain	1	0.3	1
22	q11.23	2	0.47	Loss	2	0.5	1	3	q27.1	1	0.2987	Loss	1	0.3	1
22	q13.31	2	0.22	Loss	2	0.2	1	3	q26.2	1	0.2701	Loss	1	0.3	1
X	p22.33	2	0.4	Gain	2	0.4	1	3	p21.1	1	0.2574	Gain	1	0.3	1
1	p34.1	1	1.29	Loss	1	1.3	1	3	q21.2	1	0.2569	Loss	1	0.3	1
1	p36.31	1	1.04	Gain	1	1	1	3	p22.2	1	0.2269	Gain	1	0.2	1
1	p21.2	1	0.67	Loss	1	0.7	1	3	q25.31	1	0.2183	Gain	1	0.2	1
1	p12	1	0.66	Gain	1	0.7	1	3	p25.1	1	0.2151	Gain	1	0.2	1
1	p33	1	0.51	Loss	1	0.5	1	3	p24.1	1	0.2149	Loss	1	0.2	1
1	q42.11	1	0.3	Loss	1	0.3	1	3	q25.33	1	0.1945	Gain	1	0.2	1
1	p35.1	1	0.2	Loss	1	0.2	1	3	q28	1	0.1901	Gain	1	0.2	1
1	p13.1	1	0.2	Loss	1	0.2	1	3	q13.12	1	0.1867	Gain	1	0.2	1
1	q41	1	0.18	Loss	1	0.2	1	3	q25.2	1	0.1859	Loss	1	0.2	1
1	p21.1	1	0.15	Loss	1	0.2	1	3	q27.2	1	0.1748	Loss	1	0.2	1
1	p22.3	1	0.15	Loss	1	0.2	1	3	q13.11	1	0.1719	Loss	1	0.2	1
1	p34.2	1	0.15	Gain	1	0.2	1	3	q26.32	1	0.1712	Loss	1	0.2	1
1	p32.3	1	0.15	Gain	1	0.2	1	3	p26.1	1	0.1514	Loss	1	0.2	1
1	p36.12	1	0.14	Loss	1	0.1	1	3	q25.2	1	0.1451	Gain	1	0.1	1
1	p21.3	1	0.13	Loss	1	0.1	1	3	q25.31	1	0.1449	Loss	1	0.1	1
1	q44	1	0.12	Loss	1	0.1	1	3	q25.1	1	0.1389	Gain	1	0.1	1
1	p32.1	1	0.11	Gain	1	0.1	1	3	q27.2	1	0.1281	Gain	1	0.1	1
1	q42.3	1	0.11	Gain	1	0.1	1	3	p25.3	1	0.1226	Loss	1	0.1	1
1	q32.2	1	0.11	Loss	1	0.1	1	3	q13.12	1	0.1215	Loss	1	0.1	1
2	q24.3	1	2.15	Gain	1	2.1	1	3	q11.2	1	0.1177	Loss	1	0.1	1
2	q33.2	1	1.06	Gain	1	1.1	1	3	q24	1	0.117	Gain	1	0.1	1
2	q12.2	1	0.87	Gain	1	0.9	1	3	p21.33	1	0.1163	Gain	1	0.1	1
2	q23.1	1	0.64	Gain	1	0.6	1	3	p26.3	1	0.1106	Gain	1	0.1	1
2	p15	1	0.38	Gain	1	0.4	1	3	p22.2	1	0.1079	Loss	1	0.1	1
2	q33.1	1	0.3	Loss	1	0.3	1	3	p22.1	1	0.1054	Gain	1	0.1	1
2	q37.3	1	0.26	Loss	1	0.3	1	3	q13.2	1	0.1039	Loss	1	0.1	1
2	q36.1	1	0.24	Loss	1	0.2	1	3	q13.32	1	0.1027	Gain	1	0.1	1
2	q21.3	1	0.23	Gain	1	0.2	1	4	q26	1	0.358	Loss	1	0.4	1
2	p22.2	1	0.18	Gain	1	0.2	1	4	q13.3	1	0.2536	Loss	1	0.3	1
2	q23.2	1	0.14	Gain	1	0.1	1	4	q21.1	1	0.2463	Gain	1	0.2	1
2	q24.2	1	0.14	Loss	1	0.1	1	4	q21.23	1	0.1959	Loss	1	0.2	1
2	p16.2	1	0.13	Loss	1	0.1	1	4	p11	1	0.1939	Loss	1	0.2	1
2	p13.1	1	0.12	Gain	1	0.1	1	4	p15.2	1	0.1864	Gain	1	0.2	1
2	q23.3	1	0.11	Loss	1	0.1	1	4	q13.2	1	0.1796	Loss	1	0.2	1
2	p16.3	1	0.1	Loss	1	0.1	1	4	p14	1	0.172	Gain	1	0.2	1
2	p13.1	1	0.1	Loss	1	0.1	1	4	q31.22	1	0.1476	Loss	1	0.1	1
3	q21.2	1	2.04	Gain	1	2	1	4	p15.31	1	0.1399	Gain	1	0.1	1
3	q13.12	1	1.44	Gain	1	1.4	1	4	q22.3	1	0.1351	Gain	1	0.1	1
3	q12.3	1	0.77	Gain	1	0.8	1	4	q31.3	1	0.1342	Gain	1	0.1	1
3	q25.32	1	0.56	Gain	1	0.6	1	4	q22.1	1	0.1337	Gain	1	0.1	1
3	q25.2	1	0.4	Gain	1	0.4	1	4	q21.21	1	0.1275	Gain	1	0.1	1
3	p14.1	1	0.37	Loss	1	0.4	1	4	p15.1	1	0.1117	Loss	1	0.1	1
3	p11.1	1	0.27	Gain	1	0.3	1	4	q21.3	1	0.1116	Loss	1	0.1	1
3	q12.2	1	0.27	Gain	1	0.3	1	4	q13.3	1	0.1065	Gain	1	0.1	1
3	p26.1	1	0.24	Loss	1	0.2	1	4	q13.2	1	0.106	Gain	1	0.1	1
3	p23	1	0.24	Loss	1	0.2	1	4	q23	1	0.1041	Loss	1	0.1	1
3	p26.1	1	0.23	Gain	1	0.2	1	5	q13.2	1	1.8382	Gain	1	1.8	1
3	p25.1	1	0.19	Gain	1	0.2	1	5	q33.1	1	0.4228	Loss	1	0.4	1
3	p25.2	1	0.17	Loss	1	0.2	1	5	q34	1	0.2982	Loss	1	0.3	1
3	q25.33	1	0.17	Gain	1	0.2	1	5	q13.1	1	0.2655	Gain	1	0.3	1
3	p25.1	1	0.16	Loss	1	0.2	1	5	p14.2	1	0.2362	Gain	1	0.2	1
3	q21.2	1	0.16	Loss	1	0.2	1	5	q12.1	1	0.2336	Gain	1	0.2	1
3	q12.3	1	0.16	Loss	1	0.2	1	5	q11.1	1	0.2201	Loss	1	0.2	1
3	p21.1	1	0.15	Loss	1	0.2	1	5	q23.1	1	0.2184	Gain	1	0.2	1
3	q13.33	1	0.13	Loss	1	0.1	1	5	q21.3	1	0.218	Gain	1	0.2	1
3	p22.3	1	0.13	Gain	1	0.1	1	5	p15.2	1	0.2093	Loss	1	0.2	1
3	p24.2	1	0.12	Loss	1	0.1	1	5	q33.2	1	0.2009	Gain	1	0.2	1
3	q26.33	1	0.12	Loss	1	0.1	1	5	q13.2	1	0.1949	Loss	1	0.2	1
3	p14.2	1	0.11	Gain	1	0.1	1	5	q12.1	1	0.1923	Loss	1	0.2	1
3	p26.2	1	0.11	Gain	1	0.1	1	5	q23.2	1	0.143	Gain	1	0.1	1
3	p14.1	1	0.1	Gain	1	0.1	1	5	q13.3	1	0.1408	Loss	1	0.1	1
4	p16.2	1	0.25	Gain	1	0.2	1	5	p13.1	1	0.1285	Loss	1	0.1	1
4	q22.3	1	0.23	Loss	1	0.2	1	5	q22.2	1	0.1182	Loss	1	0.1	1
4	q31.23	1	0.18	Loss	1	0.2	1	5	p13.3	1	0.1169	Loss	1	0.1	1
4	q13.2	1	0.17	Loss	1	0.2	1	5	q31.3	1	0.1089	Gain	1	0.1	1
4	q34.2	1	0.17	Loss	1	0.2	1	6	q25.1	1	0.3164	Loss	1	0.3	1
4	p15.33	1	0.16	Gain	1	0.2	1	6	q14.1	1	0.2448	Loss	1	0.2	1
4	q27	1	0.15	Loss	1	0.2	1	6	p21.31	1	0.1991	Gain	1	0.2	1
4	q22.2	1	0.15	Loss	1	0.1	1	6	q24.2	1	0.1753	Loss	1	0.2	1
4	q21.1	1	0.13	Loss	1	0.1	1	6	p24.2	1	0.1736	Loss	1	0.2	1
4	q28.3	1	0.12	Loss	1	0.1	1	6	q16.1	1	0.1646	Loss	1	0.2	1
4	q26	1	0.11	Loss	1	0.1	1	6	p22.1	1	0.1634	Gain	1	0.2	1
5	q12.3	1	0.63	Loss	1	0.6	1	6	p25.1	1	0.1625	Gain	1	0.2	1
5	q33.2	1	0.31	Loss	1	0.3	1	6	p21.2	1	0.1596	Loss	1	0.2	1
5	q13.1	1	0.27	Gain	1	0.3	1	6	p23	1	0.1486	Gain	1	0.1	1
5	p15.1	1	0.24	Gain	1	0.2	1	6	q24.1	1	0.1459	Loss	1	0.1	1
5	q13.3	1	0.22	Gain	1	0.2	1	6	p12.3	1	0.1424	Gain	1	0.1	1
5	q23.1	1	0.22	Gain	1	0.2	1	6	q11.1	1	0.1406	Loss	1	0.1	1
5	q31.2	1	0.21	Gain	1	0.2	1	6	q22.32	1	0.1375	Loss	1	0.1	1
5	p13.1	1	0.21	Loss	1	0.2	1	6	p21.33	1	0.1327	Gain	1	0.1	1
5	p13.2	1	0.15	Gain	1	0.1	1	6	q26	1	0.1327	Gain	1	0.1	1
5	q34	1	0.13	Gain	1	0.1	1	6	p25.3	1	0.123	Gain	1	0.1	1
5	p15.2	1	0.11	Loss	1	0.1	1	6	p25.1	1	0.1191	Loss	1	0.1	1
5	p14.2	1	0.11	Loss	1	0.1	1	6	q24.3	1	0.1159	Loss	1	0.1	1
6	p11.2	1	3.66	Loss	1	3.7	1	6	q27	1	0.1041	Loss	1	0.1	1
6	p25.3	1	0.41	Loss	1	0.4	1	6	q23.2	1	0.1024	Loss	1	0.1	1
6	p24.3	1	0.35	Loss	1	0.3	1	6	p22.2	1	0.1009	Gain	1	0.1	1
6	q24.2	1	0.32	Loss	1	0.3	1	7	p15.3	1	0.4761	Gain	1	0.5	1
6	q14.2	1	0.29	Loss	1	0.3	1	7	q35	1	0.4275	Gain	1	0.4	1
6	p21.31	1	0.25	Gain	1	0.3	1	7	q32.2	1	0.2052	Loss	1	0.2	1
6	q16.2	1	0.2	Loss	1	0.2	1	7	q22.2	1	0.1757	Gain	1	0.2	1
6	p22.1	1	0.19	Gain	1	0.2	1	7	q21.2	1	0.1534	Loss	1	0.2	1
6	q24.3	1	0.19	Loss	1	0.2	1	7	q36.2	1	0.1439	Loss	1	0.1	1
6	q26	1	0.16	Loss	1	0.2	1	7	p12.1	1	0.1434	Loss	1	0.1	1
6	q22.32	1	0.14	Gain	1	0.1	1	7	p14.2	1	0.1423	Gain	1	0.1	1
6	p22.1	1	0.13	Loss	1	0.1	1	7	q31.2	1	0.127	Loss	1	0.1	1
6	q16.1	1	0.13	Loss	1	0.1	1	7	q31.31	1	0.1221	Loss	1	0.1	1
6	p21.1	1	0.13	Loss	1	0.1	1	7	p15.2	1	0.1207	Gain	1	0.1	1
6	p21.32	1	0.12	Gain	1	0.1	1	7	q21.13	1	0.1142	Loss	1	0.1	1
6	q22.33	1	0.12	Gain	1	0.1	1	7	q35	1	0.1134	Loss	1	0.1	1
6	p12.1	1	0.11	Loss	1	0.1	1	7	q31.1	1	0.1125	Loss	1	0.1	1
6	q22.32	1	0.11	Loss	1	0.1	1	7	q11.21	1	0.1108	Gain	1	0.1	1
6	q22.33	1	0.11	Loss	1	0.1	1	7	p12.2	1	0.1089	Loss	1	0.1	1
6	p21.33	1	0.11	Gain	1	0.1	1	7	p15.1	1	0.1086	Gain	1	0.1	1
6	p24.1	1	0.1	Gain	1	0.1	1	7	p21.1	1	0.1085	Loss	1	0.1	1
7	q35	1	0.54	Gain	1	0.5	1	8	p11.1	1	3.7962	Gain	1	3.8	1
7	q31.31	1	0.5	Gain	1	0.5	1	8	q23.2	1	0.4135	Gain	1	0.4	1
7	p15.3	1	0.36	Loss	1	0.4	1	8	q22.1	1	0.3922	Loss	1	0.4	1
7	p22.1	1	0.35	Gain	1	0.4	1	8	q21.11	1	0.3293	Loss	1	0.3	1
7	p15.1	1	0.23	Gain	1	0.2	1	8	q21.13	1	0.2969	Loss	1	0.3	1
7	q31.33	1	0.18	Gain	1	0.2	1	8	q11.21	1	0.2753	Loss	1	0.3	1
7	q32.2	1	0.16	Loss	1	0.2	1	8	q24.12	1	0.2406	Loss	1	0.2	1
7	q32.3	1	0.15	Loss	1	0.2	1	8	q11.23	1	0.2273	Loss	1	0.2	1
7	q31.2	1	0.15	Gain	1	0.1	1	8	q24.21	1	0.1172	Loss	1	0.1	1
7	q33	1	0.14	Gain	1	0.1	1	8	q24.3	1	0.1157	Loss	1	0.1	1
7	p12.1	1	0.13	Loss	1	0.1	1	8	p23.2	1	0.1111	Loss	1	0.1	1
7	q21.2	1	0.13	Gain	1	0.1	1	8	q21.2	1	0.1042	Loss	1	0.1	1
7	q21.11	1	0.11	Loss	1	0.1	1	8	q24.13	1	0.1005	Loss	1	0.1	1
7	q21.13	1	0.11	Gain	1	0.1	1	9	p22.3	1	0.3523	Loss	1	0.4	1
8	q23.2	1	0.5	Gain	1	0.5	1	9	p13.1	1	0.3072	Gain	1	0.3	1
8	q21.13	1	0.27	Loss	1	0.3	1	9	q34.13	1	0.2942	Gain	1	0.3	1
8	q24.12	1	0.23	Loss	1	0.2	1	9	q21.12	1	0.2353	Gain	1	0.2	1
8	p23.2	1	0.2	Loss	1	0.2	1	9	p21.2	1	0.235	Gain	1	0.2	1
8	q11.22	1	0.18	Gain	1	0.2	1	9	q22.32	1	0.232	Loss	1	0.2	1
8	q22.1	1	0.13	Loss	1	0.1	1	9	p24.1	1	0.2268	Loss	1	0.2	1
8	p21.3	1	0.13	Loss	1	0.1	1	9	q22.1	1	0.2061	Gain	1	0.2	1
9	p21.1	1	0.29	Gain	1	0.3	1	9	q21.2	1	0.1864	Gain	1	0.2	1
9	q21.12	1	0.26	Gain	1	0.3	1	9	q32	1	0.1786	Loss	1	0.2	1
9	p24.3	1	0.22	Gain	1	0.2	1	9	p22.3	1	0.1436	Gain	1	0.1	1
9	q22.32	1	0.21	Loss	1	0.2	1	9	q21.2	1	0.1364	Loss	1	0.1	1
9	q31.2	1	0.21	Loss	1	0.2	1	9	p22.2	1	0.127	Gain	1	0.1	1
9	q21.2	1	0.2	Gain	1	0.2	1	9	p24.3	1	0.1221	Gain	1	0.1	1
9	p13.2	1	0.17	Loss	1	0.2	1	9	q22.1	1	0.1195	Loss	1	0.1	1
9	q21.2	1	0.17	Loss	1	0.2	1	9	q22.2	1	0.1183	Gain	1	0.1	1
9	q22.1	1	0.16	Loss	1	0.2	1	9	p23	1	0.1178	Loss	1	0.1	1
9	q34.12	1	0.14	Gain	1	0.1	1	9	q22.32	1	0.1166	Gain	1	0.1	1
9	q22.1	1	0.14	Gain	1	0.1	1	9	p23	1	0.1148	Gain	1	0.1	1
9	q21.32	1	0.13	Loss	1	0.1	1	9	p13.2	1	0.1087	Loss	1	0.1	1
9	p22.2	1	0.13	Loss	1	0.1	1	10	q26.12	1	0.6525	Gain	1	0.7	1
9	p22.1	1	0.13	Gain	1	0.1	1	10	q23.32	1	0.6174	Loss	1	0.6	1
9	q21.33	1	0.12	Loss	1	0.1	1	10	q22.2	1	0.4386	Gain	1	0.4	1
9	q21.32	1	0.12	Gain	1	0.1	1	10	q23.33	1	0.3144	Loss	1	0.3	1
9	p21.2	1	0.12	Loss	1	0.1	1	10	p15.3	1	0.275	Gain	1	0.3	1
9	q22.33	1	0.1	Loss	1	0.1	1	10	q25.3	1	0.2652	Gain	1	0.3	1
9	q32	1	0.1	Loss	1	0.1	1	10	p12.2	1	0.1816	Loss	1	0.2	1
10	q23.32	1	0.99	Loss	1	1	1	10	q21.1	1	0.1599	Loss	1	0.2	1
10	q25.3	1	0.38	Loss	1	0.4	1	10	q23.33	1	0.1594	Gain	1	0.2	1
10	q23.33	1	0.32	Gain	1	0.3	1	10	p12.1	1	0.1366	Gain	1	0.1	1
10	q24.2	1	0.26	Loss	1	0.3	1	10	q25.2	1	0.1352	Gain	1	0.1	1
10	q24.33	1	0.24	Gain	1	0.2	1	10	p14	1	0.1312	Loss	1	0.1	1
10	q24.31	1	0.2	Gain	1	0.2	1	10	p13	1	0.1275	Gain	1	0.1	1
10	q23.31	1	0.2	Loss	1	0.2	1	10	q24.32	1	0.1275	Gain	1	0.1	1
10	q24.1	1	0.19	Gain	1	0.2	1	10	q21.3	1	0.1262	Gain	1	0.1	1
10	q22.3	1	0.17	Loss	1	0.2	1	10	q24.1	1	0.1234	Loss	1	0.1	1
10	q24.31	1	0.17	Loss	1	0.2	1	10	q24.2	1	0.1205	Gain	1	0.1	1
10	p11.23	1	0.14	Loss	1	0.1	1	10	q25.3	1	0.1182	Loss	1	0.1	1
10	q26.11	1	0.14	Loss	1	0.1	1	10	q26.13	1	0.1118	Loss	1	0.1	1
10	q23.1	1	0.14	Loss	1	0.1	1	10	q23.32	1	0.104	Gain	1	0.1	1
10	q26.13	1	0.14	Loss	1	0.1	1	11	q23.1	1	1.0494	Gain	1	1	1
10	q25.1	1	0.13	Loss	1	0.1	1	11	q24.3	1	0.3943	Gain	1	0.4	1
10	p15.2	1	0.13	Gain	1	0.1	1	11	q14.3	1	0.3756	Gain	1	0.4	1
10	q11.21	1	0.11	Loss	1	0.1	1	11	q13.1	1	0.2417	Loss	1	0.2	1
10	q24.33	1	0.11	Loss	1	0.1	1	11	q13.2	1	0.2011	Gain	1	0.2	1
10	p13	1	0.1	Gain	1	0.1	1	11	q24.1	1	0.1947	Gain	1	0.2	1
11	q23.1	1	0.43	Loss	1	0.4	1	11	q13.4	1	0.1754	Gain	1	0.2	1
11	q14.2	1	0.39	Gain	1	0.4	1	11	q14.2	1	0.1486	Loss	1	0.1	1
11	q23.3	1	0.37	Loss	1	0.4	1	11	q14.3	1	0.1276	Loss	1	0.1	1
11	p15.1	1	0.15	Loss	1	0.2	1	11	q13.4	1	0.1235	Loss	1	0.1	1
11	q21	1	0.15	Gain	1	0.1	1	11	q12.3	1	0.1163	Gain	1	0.1	1
11	q14.3	1	0.15	Loss	1	0.1	1	11	p15.1	1	0.1144	Loss	1	0.1	1
11	q23.2	1	0.14	Gain	1	0.1	1	11	p14.1	1	0.1105	Gain	1	0.1	1
11	q13.1	1	0.11	Gain	1	0.1	1	11	q24.2	1	0.1088	Loss	1	0.1	1
11	q21	1	0.11	Loss	1	0.1	1	11	q12.1	1	0.1057	Gain	1	0.1	1
12	q24.32	1	3.18	Gain	1	3.2	1	11	q21	1	0.1023	Loss	1	0.1	1
12	q21.32	1	3.18	Gain	1	3.2	1	12	q14.2	1	0.364	Loss	1	0.4	1
12	q21.33	1	1.41	Gain	1	1.4	1	12	q13.11	1	0.2995	Gain	1	0.3	1
12	q13.12	1	1.2	Loss	1	1.2	1	12	q24.23	1	0.263	Loss	1	0.3	1
12	q14.2	1	0.65	Loss	1	0.7	1	12	q24.23	1	0.237	Gain	1	0.2	1
12	q23.2	1	0.56	Gain	1	0.6	1	12	p11.1	1	0.2365	Loss	1	0.2	1
12	p11.21	1	0.55	Gain	1	0.5	1	12	p12.3	1	0.2221	Loss	1	0.2	1
12	p13.31	1	0.36	Loss	1	0.4	1	12	p13.33	1	0.171	Loss	1	0.2	1
12	q21.1	1	0.34	Gain	1	0.3	1	12	q24.11	1	0.1685	Loss	1	0.2	1
12	q24.22	1	0.21	Loss	1	0.2	1	12	p13.31	1	0.1684	Gain	1	0.2	1
12	q23.3	1	0.2	Loss	1	0.2	1	12	p11.21	1	0.1632	Gain	1	0.2	1
12	q21.32	1	0.18	Loss	1	0.2	1	12	q13.3	1	0.1619	Gain	1	0.2	1
12	q13.13	1	0.13	Loss	1	0.1	1	12	q21.1	1	0.1586	Gain	1	0.2	1
12	q24.13	1	0.13	Loss	1	0.1	1	12	q15	1	0.1507	Loss	1	0.2	1
12	p13.2	1	0.12	Loss	1	0.1	1	12	q24.12	1	0.1494	Gain	1	0.1	1
13	q12.12	1	0.48	Gain	1	0.5	1	12	p13.1	1	0.1418	Loss	1	0.1	1
13	q12.3	1	0.47	Gain	1	0.5	1	12	q12	1	0.137	Loss	1	0.1	1
13	q12.11	1	0.37	Loss	1	0.4	1	12	q14.2	1	0.1348	Gain	1	0.1	1
13	q14.11	1	0.28	Loss	1	0.3	1	12	q24.21	1	0.1316	Loss	1	0.1	1
13	q22.3	1	0.24	Gain	1	0.2	1	12	q21.2	1	0.1216	Loss	1	0.1	1
13	q22.1	1	0.21	Loss	1	0.2	1	12	q13.12	1	0.1172	Gain	1	0.1	1
13	q32.1	1	0.2	Loss	1	0.2	1	12	q13.2	1	0.1127	Gain	1	0.1	1
13	q13.3	1	0.16	Gain	1	0.2	1	12	q12	1	0.1025	Gain	1	0.1	1
13	q13.1	1	0.16	Loss	1	0.2	1	13	q12.12	1	0.3948	Gain	1	0.4	1
13	q14.12	1	0.15	Loss	1	0.2	1	13	q21.2	1	0.29	Gain	1	0.3	1
13	q21.2	1	0.12	Gain	1	0.1	1	13	q22.1	1	0.2745	Loss	1	0.3	1
13	q12.2	1	0.12	Loss	1	0.1	1	13	q22.1	1	0.1781	Gain	1	0.2	1
14	q24.3	1	0.71	Gain	1	0.7	1	13	q22.2	1	0.1762	Gain	1	0.2	1
14	q32.12	1	0.29	Gain	1	0.3	1	13	q13.3	1	0.1674	Gain	1	0.2	1
14	q24.1	1	0.22	Gain	1	0.2	1	13	q13.1	1	0.1555	Gain	1	0.2	1
14	q22.3	1	0.2	Gain	1	0.2	1	13	q13.1	1	0.1372	Loss	1	0.1	1
14	q11.2	1	0.18	Loss	1	0.2	1	13	q21.33	1	0.1353	Loss	1	0.1	1
14	q12	1	0.18	Gain	1	0.2	1	13	q21.31	1	0.1031	Loss	1	0.1	1
14	q31.3	1	0.16	Gain	1	0.2	1	14	q31.2	1	0.4319	Loss	1	0.4	1
14	q21.2	1	0.13	Loss	1	0.1	1	14	q13.1	1	0.4234	Gain	1	0.4	1
14	q22.2	1	0.12	Loss	1	0.1	1	14	q23.2	1	0.3988	Loss	1	0.4	1
14	q32.31	1	0.11	Gain	1	0.1	1	14	q21.1	1	0.3927	Loss	1	0.4	1
14	q32.31	1	0.11	Loss	1	0.1	1	14	q32.31	1	0.3529	Gain	1	0.4	1
14	q23.3	1	0.11	Gain	1	0.1	1	14	q22.1	1	0.3385	Loss	1	0.3	1
14	q32.32	1	0.11	Loss	1	0.1	1	14	q13.2	1	0.3058	Gain	1	0.3	1
14	q22.2	1	0.11	Gain	1	0.1	1	14	q23.1	1	0.2527	Gain	1	0.3	1
14	q23.3	1	0.11	Loss	1	0.1	1	14	q32.11	1	0.234	Gain	1	0.2	1
15	q26.2	1	0.26	Gain	1	0.3	1	14	q32.33	1	0.1723	Loss	1	0.2	1
15	q12	1	0.25	Gain	1	0.3	1	14	q21.1	1	0.1637	Gain	1	0.2	1
15	q22.31	1	0.16	Gain	1	0.2	1	14	q31.3	1	0.1635	Gain	1	0.2	1
15	q25.2	1	0.16	Gain	1	0.2	1	14	q32.32	1	0.137	Gain	1	0.1	1
15	q21.2	1	0.13	Gain	1	0.1	1	14	q32.13	1	0.1265	Loss	1	0.1	1
15	q21.1	1	0.11	Loss	1	0.1	1	14	q22.3	1	0.1197	Gain	1	0.1	1
15	q26.1	1	0.1	Loss	1	0.1	1	14	q23.1	1	0.1062	Loss	1	0.1	1
16	q11.2	1	0.49	Loss	1	0.5	1	14	q32.12	1	0.1007	Gain	1	0.1	1
16	q23.2	1	0.4	Loss	1	0.4	1	15	q25.2	1	0.6275	Gain	1	0.6	1
16	q24.3	1	0.23	Loss	1	0.2	1	15	q11.2	1	0.4794	Loss	1	0.5	1
16	p12.1	1	0.2	Gain	1	0.2	1	15	q25.3	1	0.4424	Gain	1	0.4	1
16	p11.2	1	0.19	Gain	1	0.2	1	15	q24.3	1	0.1903	Loss	1	0.2	1
16	q22.2	1	0.13	Gain	1	0.1	1	15	q26.2	1	0.1618	Loss	1	0.2	1
16	p12.2	1	0.12	Gain	1	0.1	1	15	q25.3	1	0.1523	Loss	1	0.2	1
16	q13	1	0.11	Loss	1	0.1	1	15	q22.2	1	0.1466	Gain	1	0.1	1
17	q21.33	1	0.64	Gain	1	0.6	1	15	q11.2	1	0.1312	Gain	1	0.1	1
17	q21.2	1	0.53	Gain	1	0.5	1	16	p13.13	1	0.2608	Loss	1	0.3	1
17	p12	1	0.15	Loss	1	0.2	1	16	q21	1	0.2162	Gain	1	0.2	1
17	q21.33	1	0.15	Loss	1	0.1	1	16	q23.1	1	0.1961	Gain	1	0.2	1
17	q23.3	1	0.12	Loss	1	0.1	1	16	q11.2	1	0.1833	Loss	1	0.2	1
18	q22.3	1	0.61	Loss	1	0.6	1	16	p13.3	1	0.1736	Loss	1	0.2	1
18	q12.1	1	0.29	Loss	1	0.3	1	16	p12.2	1	0.143	Gain	1	0.1	1
18	p11.32	1	0.28	Gain	1	0.3	1	16	q23.2	1	0.1376	Loss	1	0.1	1
18	q23	1	0.2	Gain	1	0.2	1	16	q22.2	1	0.1083	Loss	1	0.1	1
18	q12.2	1	0.15	Loss	1	0.1	1	17	q11.2	1	1.1131	Gain	1	1.1	1
18	p11.21	1	0.15	Loss	1	0.1	1	17	q25.2	1	0.2912	Loss	1	0.3	1
18	q21.2	1	0.15	Loss	1	0.1	1	17	p12	1	0.2226	Gain	1	0.2	1
18	p11.31	1	0.12	Loss	1	0.1	1	17	q21.2	1	0.1972	Gain	1	0.2	1
18	q11.1	1	0.1	Loss	1	0.1	1	17	q23.1	1	0.1872	Loss	1	0.2	1
19	q13.31	1	0.63	Gain	1	0.6	1	17	q21.31	1	0.1635	Gain	1	0.2	1
19	q12	1	0.24	Loss	1	0.2	1	17	q21.33	1	0.1502	Gain	1	0.2	1
19	q13.12	1	0.24	Gain	1	0.2	1	17	q21.33	1	0.1359	Loss	1	0.1	1
19	q13.33	1	0.15	Gain	1	0.1	1	17	q21.31	1	0.1316	Loss	1	0.1	1
19	q13.32	1	0.12	Gain	1	0.1	1	17	p11.2	1	0.131	Loss	1	0.1	1
19	q13.42	1	0.12	Loss	1	0.1	1	17	q23.3	1	0.128	Loss	1	0.1	1
20	p11.1	1	0.32	Gain	1	0.3	1	17	q24.1	1	0.1198	Gain	1	0.1	1
20	q11.21	1	0.2	Loss	1	0.2	1	17	p13.2	1	0.1129	Gain	1	0.1	1
20	q13.2	1	0.11	Loss	1	0.1	1	17	q23.3	1	0.1018	Gain	1	0.1	1
21	q22.2	1	0.17	Loss	1	0.2	1	18	q11.2	1	0.2754	Gain	1	0.3	1
22	q11.1	1	0.22	Gain	1	0.2	1	18	q21.31	1	0.1854	Loss	1	0.2	1
X	p22.11	1	1.5	Gain	1	1.5	1	18	q23	1	0.1646	Loss	1	0.2	1
X	q27.1	1	0.21	Gain	1	0.2	1	18	q22.3	1	0.1551	Loss	1	0.2	1
X	q13.2	1	0.19	Gain	1	0.2	1	18	q12.3	1	0.1549	Loss	1	0.2	1
X	q21.32	1	0.18	Gain	1	0.2	1	18	p11.21	1	0.152	Gain	1	0.2	1
X	q27.2	1	0.14	Gain	1	0.1	1	18	q21.33	1	0.1507	Gain	1	0.2	1
X	q22.2	1	0.12	Gain	1	0.1	1	18	q21.32	1	0.109	Loss	1	0.1	1
X	q11.1	1	0.12	Gain	1	0.1	1	19	p13.12	1	0.3914	Loss	1	0.4	1
Y	p11.2	1	3.91	Loss	1	3.9	1	19	p13.2	1	0.2377	Gain	1	0.2	1
Y	q11.21	1	0.59	Loss	1	0.6	1	19	q13.33	1	0.1977	Gain	1	0.2	1
								19	q13.13	1	0.1905	Loss	1	0.2	1
								19	q13.41	1	0.1889	Gain	1	0.2	1
								19	q13.32	1	0.1888	Gain	1	0.2	1
								19	p13.12	1	0.1815	Gain	1	0.2	1
								19	q12	1	0.1437	Gain	1	0.1	1
								19	q13.31	1	0.1339	Loss	1	0.1	1
								19	q13.32	1	0.1332	Loss	1	0.1	1
								19	q13.31	1	0.1326	Gain	1	0.1	1
								19	q13.33	1	0.1003	Loss	1	0.1	1
								20	q13.13	1	0.2069	Loss	1	0.2	1
								20	p12.3	1	0.1994	Loss	1	0.2	1
								20	q11.23	1	0.188	Loss	1	0.2	1
								20	p13	1	0.1802	Loss	1	0.2	1
								20	q11.22	1	0.1457	Gain	1	0.1	1
								20	p11.23	1	0.1367	Loss	1	0.1	1
								20	p12.2	1	0.1105	Gain	1	0.1	1
								20	q13.12	1	0.1064	Loss	1	0.1	1
								21	q22.13	1	0.1855	Gain	1	0.2	1
								21	q22.11	1	0.1554	Loss	1	0.2	1
								21	q22.11	1	0.1061	Gain	1	0.1	1
								22	q13.32	1	0.1876	Loss	1	0.2	1
								22	q13.33	1	0.1441	Gain	1	0.1	1
								22	q12.1	1	0.1224	Gain	1	0.1	1
								22	q11.22	1	0.1125	Loss	1	0.1	1
								X	p11.23	1	18.967	Loss	1	19	1
								X	q23	1	12.537	Loss	1	12.5	1
								X	q27.1	1	9.8003	Loss	1	9.8	1
								X	p21.3	1	8.8737	Loss	1	8.9	1
								X	p11.1	1	3.73	Gain	1	3.7	1
								X	p11.1	1	3.6081	Loss	1	3.6	1
								X	p21.1	1	2.3575	Loss	1	2.4	1
								X	p22.11	1	0.5495	Loss	1	0.5	1
								X	p11.3	1	0.4075	Loss	1	0.4	1
								X	q12	1	0.3523	Loss	1	0.4	1
								X	p11.4	1	0.3306	Gain	1	0.3	1
								X	p22.13	1	0.2238	Gain	1	0.2	1
								X	q11.1	1	0.1855	Gain	1	0.2	1
								X	q22.1	1	0.1616	Gain	1	0.2	1
								X	q24	1	0.1615	Loss	1	0.2	1
								X	q22.1	1	0.1564	Loss	1	0.2	1
								X	q21.33	1	0.1543	Gain	1	0.2	1
								X	q21.2	1	0.1508	Gain	1	0.2	1
								X	p11.23	1	0.14	Gain	1	0.1	1
								X	q21.2	1	0.1396	Loss	1	0.1	1
								X	p22.11	1	0.1342	Gain	1	0.1	1
								X	q27.3	1	0.134	Gain	1	0.1	1
								X	q21.32	1	0.1301	Gain	1	0.1	1
								X	p22.2	1	0.125	Gain	1	0.1	1
								X	p22.2	1	0.1216	Loss	1	0.1	1
								X	q21.31	1	0.1161	Loss	1	0.1	1
								X	q13.1	1	0.1112	Gain	1	0.1	1
								X	q13.2	1	0.1047	Gain	1	0.1	1
								X	q21.33	1	0.1003	Loss	1	0.1	1
								X	q26.1	1	0.1	Gain	1	0.1	1
								Y	p11.31	1	0.7193	Gain	1	0.7	1
								Y	p11.31	1	0.6196	Loss	1	0.6	1
								Y	q11.222	1	0.4849	Loss	1	0.5	1
